## **Relating growth potential and biofilm formation of Shigatoxigenic *Escherichia coli* to *in planta* colonisation and the metabolome of ready- to-eat crops**

**Running title:** STEC growth characteristics in plants

### **Authors:**

Bernhard Merget <sup>a,b</sup>, Ken J. Forbes <sup>c</sup>, Fiona Brennan <sup>d</sup>, Sean McAteer <sup>e</sup>, Tom Shepherd <sup>a</sup>,  
Norval J.C. Strachan <sup>b</sup>, Nicola J. Holden <sup>a#</sup>

### **Affiliations:**

a: Cell and Molecular Sciences, The James Hutton Institute, Dundee, DD2 5DA, UK

b: School of Biological Sciences, The University of Aberdeen, Cruickshank Building. St Machar Drive, Aberdeen, AB24 3UU, UK

c: School of Medicine and Dentistry, The University of Aberdeen, Foresterhill, Aberdeen, AB25 2ZD, UK

d: Teagasc, Dept. of Environment, Soils and Land-Use, Johnstown Castle, Wexford, Republic of Ireland

e: Roslin Institute & R(D)SVS, The University of Edinburgh, Easter Bush, EH25 9RG, UK

# for correspondence: [nicola.holden@hutton.ac.uk](mailto:nicola.holden@hutton.ac.uk)

**Word Count:** 5891 / 6000 (ex. Methods, Refs, Fig Legs, Tables)

**Keywords:** spinach; lettuce; alfalfa; fenugreek; *E. coli* O157:H7; EHEC

1 Abstract (247 / 250 words)

2 Contamination of fresh produce with pathogenic *Escherichia coli*, including Shigatoxigenic *E.*  
3 *coli* (STEC), represents a serious risk to human health. Colonisation is governed by multiple  
4 bacterial and plant factors that can impact on the probability and suitability of bacterial growth.  
5 Thus, we aimed to determine whether the growth potential of STEC for plants associated with  
6 foodborne outbreaks (two leafy vegetables and two sprouted seed species), is predictive for  
7 colonisation of living plants as assessed from growth kinetics and biofilm formation in plant  
8 extracts. Fitness of STEC was compared to environmental *E. coli*, at temperatures relevant to  
9 plant growth. Growth kinetics in plant extracts varied in a plant-dependent and isolate-  
10 dependent manner for all isolates, with spinach leaf lysates supporting the fastest rates of  
11 growth. Spinach extracts also supported the highest levels of biofilm formation. Saccharides  
12 were identified as the major driver of bacterial growth, although no single metabolite could be  
13 correlated with growth kinetics. The highest level of *in planta* colonisation occurred on alfalfa  
14 sprouts, though internalisation was 10-times more prevalent in the leafy vegetables than in  
15 sprouted seeds. Marked differences in *in planta* growth meant that growth potential could only  
16 be inferred for STEC for sprouted seeds. In contrast, biofilm formation in extracts related to  
17 spinach colonisation. Overall, the capacity of *E. coli* to colonise, grow and internalise within  
18 plants or plant-derived matrices were influenced by the isolate type, plant species, plant tissue  
19 type and temperature, complicating any straight-forward relationship between *in vitro* and *in*  
20 *planta* behaviours.

21 Importance (149 / 150 word)

22 Fresh produce is an important vehicle for STEC transmission and experimental evidence  
23 shows that STEC can colonise plants as secondary hosts, but differences in the capacity to  
24 colonise occur between different plant species and tissues. Therefore, an understanding of the  
25 impact of these plant factors have on the ability of STEC to grow and establish is required for  
26 food safety considerations and risk assessment. Here, we determined whether growth and the  
27 ability of STEC to form biofilms in plants extracts could be related to specific plant metabolites  
28 or could predict the ability of the bacteria to colonise living plants. Growth rates for sprouted  
29 seeds (alfalfa and fenugreek) exhibited a positive relationship between plant extracts and living  
30 plants, but not for leafy vegetables (lettuce and spinach). Therefore, the detailed variations at  
31 the level of the bacterial isolate, plant species and tissue type all need to be considered in risk  
32 assessment.

33

## 34 Introduction

35 Contamination of fresh produce from Shiga-toxigenic *Escherichia coli* (STEC) presents a  
36 serious hazard as a cause of food-borne illnesses, diarrhoea and enterohemorrhagic disease.  
37 Fresh produce is a major vehicle of transmission of STEC, with foods of plant origin accounting  
38 for the majority of *E. coli* and *Shigella* outbreaks in the USA (50). Fresh produce is often eaten  
39 raw or minimally processed and contamination of the produce can occur at any point along the  
40 food chain from farm to fork, with major outbreaks e.g. spinach (30) and sprouted seeds (6).  
41 STEC has been shown to interact with plants and can use them as secondary hosts (16, 25),  
42 which has implications for pre-harvest contamination, as well as persisting on post-harvest  
43 produce (29, 31, 32, 34, 52).

44 Colonisation of host plants by *E. coli* is governed by a range of environmental, bacterial and  
45 plant factors. Initial contact and attachment of bacteria on plant tissue is defined by motility,  
46 adherence factors and plant cell wall components (33, 64, 65), while establishment is  
47 influenced by a range of plant biotic (44, 67, 68) and abiotic factors (15, 62). The ability of  
48 bacteria to grow in the presence of plant material is a key factor in assessing risk, and  
49 although proliferation is well known to be influenced by physio-chemico factors (5, 23, 57, 58),  
50 risk assessments for STEC on fresh produce tend to consider plants as a homogenous whole  
51 (12, 21, 51).

52 STEC preferentially colonise the roots and rhizosphere of fresh produce plants over leafy  
53 tissue and have been shown to internalise into plant tissue, where they can persist in the  
54 apoplastic space as endophytes (13, 72). The apoplast contains metabolites, such as solutes,  
55 sugars, proteins and cell wall components (54) and as such provides a rich environment for

56 many bacterial species, both commensal bacteria and human pathogens (20, 28). The rate of  
57 STEC internalisation is dependent on multiple factors including the plant species and tissue  
58 (73) and how plants are propagated (17-19). Specificity in the response of STEC to different  
59 plant species and tissue types has been demonstrated at the transcriptional level (9, 38).  
60 Therefore, there is a need to take into account specificity of the STEC-plant interactions that  
61 could impact risk.

62 Determination of the growth potential of a bacterial population takes into account the  
63 probability of growth together with the suitability of the growing population for a particular  
64 environment (22). It is used as a measure in risk assessment, e.g. for growth of STEC in water  
65 (70). In plant hosts, bacterial growth potential is governed by several factors, including  
66 bacterial growth rates, initial adherence and colony establishment, which is often in biofilms, as  
67 well as plant-dependent factors including metabolite availability and the ability to withstand  
68 plant defence responses (26). Therefore, the aim here was to determine if *in vitro* growth  
69 kinetics and biofilm formation of STEC in plant extracts, together with plant metabolite  
70 analysis, could be related to colonisation of plants that are associated with food-borne  
71 outbreaks, and hence inform on growth potential of STEC *in planta*. Use of genetically distinct  
72 *E. coli* isolates (two STEC, two environmental and one laboratory isolate) enabled assessment  
73 of phenotypic variation within plants or plant-derived matrices to be compared. Growth kinetics  
74 and biofilm formation were quantified in different tissue extracts of two leafy vegetables, lettuce  
75 and spinach, and two sprouted seeds, fenugreek and alfalfa sprouts. Growth kinetics was  
76 related to metabolomics of the extracts. Quantification of *in planta* colonisation and  
77 internalisation allowed a correlation analysis for two STEC isolates.

78

## 79 Results

### 80 Growth rate parameterisation

81 To relate growth potential to colonisation of STEC in fresh produce plants, *in vitro* growth rates  
82 were first measured in plant extracts. Representative edible species associated with food-  
83 borne outbreaks were used: two leafy greens (lettuce, spinach) and two sprouted seeds  
84 (fenugreek, alfalfa). Plant tissues used were to represent edible, non-edible and internalised  
85 tissues of the leafy greens from total lysates of leaves or roots, and apoplastic washing  
86 recovered from leaves, respectively, while total sprout lysates were used to represent edible  
87 sprouts. A panel of five *E. coli* was assessed (Table 1) to allow relative fitness of two STEC  
88 O157:H7 Stx- isolates derived from fresh produce-associated outbreaks to be compared to two  
89 environmental isolates from plant roots and soil. A K-12 faecal-derived and laboratory-adapted  
90 isolate was included for reference. Growth was assessed at three temperatures (18, 20 and 25  
91 °C) to represent relevant growth temperatures of leafy greens and sprouted seeds. Growth  
92 kinetics were measured from optical densities derived from a plate reader (as described by  
93 others (22)).

### 94 *E. coli* growth rates in plant extracts

95 Primary modelling of *in vitro* growth data in plant extracts successfully fitted 86.7 % (117 of  
96 135) growth curves with a non-linear Baranyi model (SM1). Mis-fits were improved by manually  
97 truncating the growth curves to before the observed decrease in cell density that occurred in  
98 stationary phase, resulting in  $R^2_{adj} = 0.996$  (Fig. S1, Table S1). Comparison of the maximum  
99 growth rates ( $\mu$ ) showed highest growth rates in spinach extracts, with fastest growth in leaf  
100 lysates at 18 °C or apoplast at 25 °C (Fig. 1A), while in lettuce the fastest growth occurred in

101 apoplastic extract at all temperatures tested (Fig. 1B). All isolates grew consistently faster in  
102 fenugreek sprout extracts than in alfalfa, and either sprout extract supported faster growth than  
103 defined medium (RDMG) (Fig. 1C). The *E. coli* O157:H7 isolates showed differential  
104 responses in the different extracts and their growth rates were as fast or faster than the  
105 environmental isolates in almost all extracts. The lowest growth rates occurred for the  
106 laboratory-adapted isolate MG1655. The plant extract tissue-type as well as the bacterial  
107 isolate significantly impacted  $\mu$ , from a two-way ANOVA at 18 °C ( $F(4, 7363) = 76.3$ ;  $p <$   
108  $0.0001$  and  $F(8, 7363) = 436.4$ ;  $p < 0.0001$ , for bacterial isolate and extract type, respectively)  
109 and at 20 °C ( $F(4, 8387) = 160.3$ ;  $p < 0.0001$  and  $F(8, 8387) = 416.1$ ;  $p < 0.0001$ , for bacterial  
110 isolate and extract type, respectively).

111 Growth was almost always highest at 25 °C, although with exceptions, e.g. for *E. coli* O157:H7  
112 isolate ZAP1589 in lettuce extracts. Growth characteristics were similar at both 18 and 20 °C,  
113 but  $\mu$  were in general lower at 20 °C than at 18 °C. This counterintuitive result was  
114 reproducible and occurred in all growth experiments. It meant that secondary modelling for  
115 temperature was not possible. It was possible, however, for temperature-effects of growth in  
116 the defined medium without plant extracts, which produced a linear distribution for temperature  
117 for all five *E. coli* isolates ( $R^2 = 0.996$  to 1) (SM2), indicating the effect was due to the plant  
118 extracts and not a systemic error.

#### 119 Metabolite analysis of fresh produce plant extracts

120 To establish the impacts of different plant components on the growth of the *E. coli* isolates,  
121 metabolite analysis was determined for the extracts. Detection of absolute levels of mono- and  
122 disaccharides (sucrose, fructose, glucose, arabinose) showed the highest abundance in

123 fenugreek sprout extracts, followed by lettuce apoplast and lettuce leaf lysates (Table 2).  
124 Sucrose was the most abundant sugar in all species and cultivars, except for alfalfa, which had  
125 high levels of fructose and glucose. Arabinose was only detected in the apolastic fluid of  
126 spinach and lettuce, accounting for 0.36 % and 0.23 % of all sugars, respectively. A two-way  
127 ANOVA found significant differences for tissue types ( $F(7, 60) = 16.5$ ;  $p < 0.0001$ ).

128 The levels of amino acids and other metabolites were determined from identification of 116  
129 polar metabolites, of which 60 were assigned and mapped onto a simplified polar metabolite  
130 pathway for plants to visualise metabolite availability for the bacteria (Fig. S2). The abundance  
131 ratio of each compound against the internal standard ribitol, generated a response ratio (RR)  
132 to allow semi-quantitative comparison (Table S2). Differences occurred between species and  
133 tissue types in a similar pattern to the mono- and disaccharides (Table 2), and for 12  
134 metabolites including fructose, glucose and sucrose, there were significantly different RR (two-  
135 way ANOVA and Tukey multiple comparison,  $F(7, 854) = 37.2$ ,  $p < 0.0001$ ). Small amounts of  
136 arabinose could be found in all tissues with no significant differences between host species or  
137 tissue types. Grouping metabolites by structure (Fig. 2A) for monosaccharides,  
138 polysaccharides, amino acids, organic acids and other metabolites, showed that the highest  
139 total saccharides were present in fenugreek sprouts, while alfalfa was higher in  
140 monosaccharides and amino acids. The organic acids in spinach apoplast consisted mainly of  
141 oxalic acid, which was almost double the amount in spinach leaf lysates. The percentage  
142 composition showed that the majority of metabolites in all lettuce extracts are polysaccharides,  
143 compared to mainly of organic acids in all spinach extracts.

144 Significant variation of the metabolite content occurred between plant tissues, as well as for  
145 and individual metabolites (two-way ANOVA from assuming a parametric distribution,  $F(420,$



146 854) = 43.15;  $p < 0.001$ ). A principal components analysis (PCA) showed that the first five  
147 components accounted for ~ 85 % of variance, and 50 % of the variance for all detectable  
148 polar metabolites ( $n=116$ ) was attributed to PC1 and 2 (Fig. 2B). This was supported by  
149 significant positive correlation for leaf lysates and apoplast extracts of lettuce and spinach ( $R^2$   
150  $> 0.97$ ), a weak correlation for the root lysates based on species ( $R^2$  0.542 – 0.757), with no  
151 significant correlation between any species for the tissues.

### 152 The influence of plant extract metabolites on *E. coli* growth

153 To relate any specific plant metabolites to bacterial growth, a correlation analysis was carried  
154 out between the plant extracts growth rates for two *E. coli* O157:H7 isolates (Sakai and  
155 ZAP1589) and the assigned metabolites. Several organic acids positively associated with  
156 maximal growth rates ( $\mu$ ), although there was a temperature-dependent effect. Metabolites  
157 associate with growth at 18 °C for isolate Sakai were galactosyl glycerol, threonic acid, and  
158 oxoproline ( $p \sim 0.04$ ); at 20 °C, malic acid, fumaric acid and quinic acid ( $p = 0.014 - 0.048$ );  
159 and at 25 °C oxalic acid ( $p = 0.009$ ), aspartic acid ( $p = 0.038$ ), glutamic acid ( $p = 0.046$ ),  
160 coumaric acid ( $p = 0.011$ ) and uridine ( $p = 0.011$ ). Chlorogenic acid (*trans*-5-O-caffeoyl-D-  
161 quinate) was consistently associated with growth for all temperatures ( $p$  0.04 at 18 °C,  $p$  0.004  
162 at 20 °C, and  $p$  0.04 at 25 °C). *E. coli* isolate ZAP1589 gave similar results, although there was  
163 also a bacterial isolate effect as there were no significant associations at 20 °C. Therefore, no  
164 single metabolite was identified as the major factor influencing *E. coli* growth rate, with a  
165 significant impact from growth temperature.

166 The main metabolite groups were then investigated as groups that could influence bacterial  
167 growth, by generating defined 'artificial' growth media comprising the main plant extract

168 metabolites. The six most abundant metabolites were selected from lettuce apoplast or sprout  
169 extracts to represent contrasting metabolite profiles (Table 3). Each of the major groups of  
170 saccharides (SA), organic acids (OA) or amino acids (AA) were assessed independently by  
171 dilution, to restrict their effect, and at temperatures relevant to lettuce (18 °C) and sprouts (25  
172 °C). Maximal growth rates were similar in the sprout and lettuce extract artificial medium (Fig.  
173 3), although reduced compared to the 'complete', natural extracts (Fig. 1). Growth rates were  
174 significantly reduced when the concentration of the saccharide group (SA) was reduced for  
175 both artificial media (all  $p < 0.0049$ ), while restriction of the amino acids (AA) or organic acids  
176 (OA) had no impact (Fig. 3). The SA-dependent effect occurred for all *E. coli* isolates, although  
177 there were also significant isolate dependencies (two-way ANOVA,  $F(16, 28637) = 39.5$ ;  $p <$   
178  $0.0001$  at 25 °C; two-way ANOVA,  $F(4, 9544) = 401.3$ ;  $p < 0.0001$  at 18 °C).

#### 179 [The influence of plant extracts on \*E. coli\* biofilm formation](#)

180 On host tissue *in planta*, bacterial colonies are more likely to be present in biofilms rather than  
181 as single cells. Therefore, the influence of the plant extracts of the leafy vegetables was tested  
182 for *E. coli* biofilm ability in isolation, i.e. on polystyrene surfaces. Spinach leaf lysates and root  
183 lysates were the only extracts that induced biofilm for all isolates, albeit minimal for isolate  
184 MG1655 ( $p < 0.0011$ , compared to isolate MG1655) (Table 4). The remaining extracts were  
185 not as conducive for biofilm formation, with the exception of one of the environmental isolates  
186 (JHI5025). This was not explained by different growth rates since this isolate did not exhibit the  
187 fastest growth rates in the extracts compared to the others (Fig. 1) and must therefore reflect  
188 increased adherence in the presence of the plant extracts. A qualitative risk ranking was  
189 determined for implementation of biofilm formation as a risk factor for the *E. coli* O157:H7  
190 isolates (Sakai and ZAP1589) that identified spinach roots as the highest risk (from highest to

191 lowest): spinach roots > spinach leaves > lettuce roots > lettuce leaves > spinach apoplast >  
192 lettuce apoplast.

### 193 *E. coli* O157:H7 colonisation and internalisation *in planta*

194 *E. coli* O157:H7 colonisation of leafy vegetables and sprouts was quantified to determine  
195 whether growth kinetics and biofilm formation in the extracts were predictive of *in planta*  
196 colonisation. Colonisation of the *E. coli* O157:H7 isolate (ZAP1589) was quantified on spinach  
197 and lettuce, and for both isolates (ZAP1589 and Sakai) on sprouted seeds. Our previous *in*  
198 *planta* data for lettuce and spinach plants showed that the highest levels of *E. coli* isolate Sakai  
199 occurred on spinach roots (73). Inoculation of spinach and lettuce with the high dose ( $10^7$  cfu  
200  $\text{ml}^{-1}$ ) of *E. coli* isolate ZAP1589 also resulted in higher levels of bacteria on the roots compared  
201 to leaves, with similar levels on spinach and lettuce roots, e.g.  $2.53 \pm 0.97$  and  $2.69 \pm 0.88$  log  
202 ( $\text{cfu g}^{-1}$ ) at day 14, respectively (Fig. 4A, B). *In planta* colonisation of sprouted seeds by the  
203 two *E. coli* O157:H7 reference isolates was quantified for plants grown under conditions that  
204 mimic industry settings (hydroponics at 25 °C, three days) (Fig. 4C-F). A low inoculation dose  
205 of  $10^3$  cfu  $\text{ml}^{-1}$  was used and total viable counts on day 0 were estimated by MPN since they  
206 fell below the direct plating detection threshold. Total counts of isolate Sakai increased by 4.5  
207 log ( $\text{cfu g}^{-1}$ ) on alfalfa sprouts and 3 log ( $\text{cfu g}^{-1}$ ) on fenugreek sprouts, between 0 and 2 dpi.  
208 Viable counts for isolate ZAP1589 were generally lower on both sprouted seeds compared to  
209 isolate Sakai, but still reached  $6.00 \pm 0.253$  log ( $\text{cfu g}^{-1}$ ) on alfalfa 2 dpi.

210 Internalisation was also assessed since endophytic behaviour is a feature of *E. coli* O157:H7  
211 colonisation of fresh produce plants and growth potential could be reflected by growth in the  
212 apoplast washings. Internalisation of isolate ZAP1589 occurred to higher levels in spinach

213 roots compared to lettuce roots (Fig. 4A, B), although the prevalence was similar in both plant  
214 species (60 % and 58.3 % of plants contained endophytic bacteria). In contrast, internalisation  
215 in sprouts only occurred on three occasions in all the experiments: isolate Sakai in alfalfa (1.07  
216 log (cfu g<sup>-1</sup>)) and fenugreek (1.53 log (cfu g<sup>-1</sup>)) on day 1, and isolate ZAP1589 in alfalfa (1.87  
217 log (cfu g<sup>-1</sup>)) on day 2. The prevalence was 7.1 % (1/14 samples positive), although the viable  
218 counts were close to the limit of detection by direct plating. Therefore, internalisation of *E. coli*  
219 O157:H7 isolates Sakai and ZAP1589 appeared to be a rare event on sprouted seeds,  
220 although they colonised the external sprout tissue to higher levels than on lettuce or spinach.

#### 221 *Correlating in planta colonisation with plant extract growth rate kinetics*

222 To relate growth kinetics in extracts with *in planta* growth, growth rates were estimated for *in*  
223 *planta* growth. This was possible for sprouted seeds since colonisation levels increased over  
224 time (Fig. 4). Alfalfa plants supported significantly faster growth rates for both *E. coli* O157:H7  
225 isolates compared to fenugreek, at  $2.23 \pm 0.213$  log cfu g<sup>-1</sup> per day ( $R^2 = 0.720$ ) and  $1.50 \pm$   
226  $0.0913$  log cfu g<sup>-1</sup> ( $R^2 = 0.863$ ) for Sakai on alfalfa and fenugreek sprouts, respectively, and for  
227 isolate ZAP1589, rates of  $2.24 \pm 0.159$  log cfu g<sup>-1</sup> ( $R^2 = 0.822$ ) and  $0.710 \pm 0.116$  log cfu g<sup>-1</sup> ( $R^2$   
228  $= 0.464$ ) per day on alfalfa and fenugreek sprouts, respectively. The difference in growth rate  
229 between the isolates on fenugreek sprouts was significant ( $p < 0.0001$ ). Although *in planta*  
230 growth rates for *E. coli* isolates Sakai were estimated on spinach tissues (leaves, roots or  
231 internalised in leaf apoplast) or lettuce (leaves, roots) from low inoculation dose ( $10^3$  cfu ml<sup>-1</sup>)  
232 (73) these were non-significant since growth over the 10 day period was minimal or completely  
233 constrained, with a high degree of plant-to-plant variation. Growth rate estimates were not

234 made when a high starting inoculum was used since the colonisation levels decreased over  
235 time (Fig. 4).

236 Comparison of the *in planta* and extract growth rate estimates were made for both *E. coli*  
237 O157:H7 isolates on sprouted seeds (at 25 °C) or in spinach and lettuce (at 18 °C) (Fig. 5). A  
238 positive correlation occurred for growth rate estimates in the sprouted seeds ( $R^2 = 0.516$ ),  
239 although this was not significant. Since *in planta* growth in spinach or lettuce tissues was  
240 minimal, there was no correlation with growth rates in corresponding extracts. Therefore, the  
241 restrictions in bacterial growth that occurred with living plants meant that growth rates in  
242 extracts could not be extrapolated to *in planta* growth potential for leafy vegetables, but did  
243 bear a positive relationship for sprouted seeds.

244

## 245 Discussion

246 The potential for food-borne bacteria to grow in fresh produce food commodities is a key  
247 consideration in quantitative risk assessment. Factors that influence bacterial growth are the  
248 plant species and tissue, the bacterial species or isolate, and the surrounding environment.  
249 The growth potential of a bacterial population consists of proportion of the growing sub-  
250 population and the suitability of the environment for growth, and it provides a quantitative  
251 description of probability of growth (22). Therefore, the factors that influence growth potential  
252 of STEC in edible plants include plant-dependent and physio-chemico factors, as well as  
253 bacterial isolate-specific responses. Metabolically active components of plants can be  
254 extrapolated from plant extracts for bacterial growth dynamic measurements coupled with  
255 metabolite analysis. They also represent a bacterial growth substrate in their own right that  
256 could arise during the post-harvest production process e.g. from cut surfaces. A number of  
257 studies show growth of food-borne bacteria on plant extracts during the production process  
258 (35, 55, 56) and growth potential for *E. coli* O157:H7 has been evaluated in water (70). Here,  
259 maximum growth rates in plant extracts were strongly influenced by the plant tissue type and  
260 species, as well as the *E. coli* isolate tested and overlaid by temperature-dependent effects. *In*  
261 *planta* growth rates, however, was markedly different between the sprouted seeds and leafy  
262 vegetables, with a growth restriction evident in the leafy vegetables. The plant-dependent  
263 factors that could account for this difference include plant age, defence response, growth  
264 conditions and associated microbiomes. As such growth rates in the extracts could not be  
265 used to infer *in planta* growth potential for spinach or lettuce. In contrast, proliferation on  
266 sprouted seeds did bear a positive relationship to growth rates in extracts, although it was also  
267 dependent on the plant species and on bacterial isolate tested.

268 Saccharides were shown to be the major driving force for *E. coli* growth, which is unsurprising  
269 given their role in central metabolism (41). Although the levels of the most abundant sugars,  
270 glucose, fructose and sucrose (the disaccharide of glucose and fructose) could explain the  
271 high growth rates in sprout extracts, similarly rapid growth did not occur in lettuce leaf lysate  
272 extract, despite an abundance of sugars, indicating that plant species-specific inhibitory  
273 compounds exist. This is supported by the occurrence of more rapid growth rates in spinach  
274 leaf extracts compared to lettuce. Plant-dependent factors that could influence bacterial growth  
275 potential include the innate defence response (33), antimicrobial activity of plant secondary  
276 metabolites (71) and plant development stage (74).

277 Bacterial growth rates were not significantly impacted by manipulation of the major amino or  
278 organic acids from the extracts, although the phenolic acid, chlorogenate (*trans*-5-O-caffeoyl-  
279 D-quinic acid) was positively associated with growth. This contrasts to reports of its ability to  
280 inhibit fatty acid synthesis in *E. coli* isolate MG1655 (37) and prevent *E. coli* growth (75), but  
281 may be explained by differences in concentration between the extracts and exogenous  
282 application. Oxalate levels were relatively high in spinach, in keeping with previous reports that  
283 show an average as high as ~ 1000 mg / 100 g fresh weight (47) and correlated with growth for  
284 isolate Sakai at 25 °C. Amino acids levels were substantially higher in sprouted seed extracts  
285 compared to the leafy vegetables, which is likely a reflection of different developmental stages  
286 of the plants (4). It was notable that the artificial media did not support equivalent growth rates  
287 to the 'complete', natural extract media, indicating that other, minor nutrients in the extracts  
288 were utilised for maximal bacterial growth and also need to be accounted for in growth  
289 dynamics.

290 Bacteria including STEC, tend to form biofilms in association with plant tissue (11, 73, 74).  
291 Here, a risk ranking could be inferred from biofilm formation in the extracts, with spinach roots  
292 ranked highest. Curli is an important biofilm component for STEC associated with plants (7),  
293 but other biofilm components are likely to be responsible for the biofilm formation in extracts,  
294 since isolate Sakai did not form biofilms in spinach apoplast extract *in vitro* but does produce  
295 curli during endophytic colonisation and biofilm formation in leaves (73). This indicates that  
296 specific *in planta* cues induce different biofilm components. Alternative biofilm components that  
297 may be involved include Type 1 fimbriae, which was shown to be expressed by the  
298 environmental isolates JHI5025 and JIH5039 at 20 °C and promoted binding to spinach roots  
299 (40).

300 Internalisation of STEC into apoplastic spaces in plants presents a hazard as pathogens  
301 cannot be removed by conventional sanitation methods. However, growth potential for  
302 internalised *E. coli* O157:H7 could not be inferred from growth in apoplast extracts since  
303 endophytic proliferation was prevented or reduced in the apoplast (73). As the apoplast is a  
304 habitat for plant-associated endophytes (66) and phytopathogens (63), it appears that for *E.*  
305 *coli* additional factors such as the plant defence response need to be considered. The  
306 increased likelihood of internalisation into tissues of leafy vegetables compared to sprouted  
307 seeds for the *E. coli* O157:H7 isolates could be due to multiple factors including plant age, the  
308 competing microbiota and access to nutrients. Plant dependent factors have also been shown  
309 to impact colonisation of lettuce cultivars by STEC (Quilliam, et al. (59).

310 *In planta* colonisation of *E. coli* O157:H7 isolate Sakai was significantly higher than isolate  
311 ZAP1589, in both leafy tissue types and on both sprouted seed species (73). In contrast,  
312 growth rates in the plant extracts and in artificial media overlapped, albeit with specific extract-



313 specific differences. Since isolate ZAP1589 was found to be flagellate but non-motile, this may  
314 reflect a role for flagella in plant colonisation (65). ZAP1589 growth rates on sprouted seeds  
315 were similar to the rates reported for other *E. coli* O157:H7 isolates on 2-day old alfalfa sprouts  
316 (8). Growth rates of both *E. coli* O157:H7 isolates in the extracts was, in general, as high as  
317 the environmental isolates, and almost always higher than the K-12 isolate, indicating  
318 similarities in fitness levels for STEC and environmental *E. coli*.

319 The ability of *E. coli* isolates to metabolise different carbon sources varies and could contribute  
320 to the isolate-dependent variations in growth rates. Although less than 50 % of *E. coli* isolates  
321 can metabolise sucrose (41), *E. coli* O157:H7 isolate Sakai encodes the sucrose transport  
322 genes (1) and sucrose degradation genes were expressed by this isolate on exposure to  
323 spinach extracts (9). The sucrose translocator from *S. enterica* serovar Typhimurium was  
324 expressed by a related epiphyte *in planta* (46). In contrast, fructose and glucose are sufficient  
325 sole carbon source-metabolites for *E. coli* and their role in bacterial metabolism is well  
326 characterised (41). An *E. coli* fructose metabolism gene has also been expressed in a related  
327 epiphyte *in planta* (36).

328 Growth rates normally positively correlate with temperature (60), as was observed for growth  
329 rates in the defined medium without plant extracts, which exhibited a linear distribution from 18  
330 °C to 25 °C. However, maximal growth rates in the extracts were influenced in a non-linear  
331 manner by temperature. Similarly, a non-linear effect was reported in a meta-study on growth  
332 of STEC on lettuce (42). This could be due to *E. coli* adaption to the plant environment and  
333 resulting metabolic responses (9), and reflects the different organic acid correlations that  
334 occurred for different temperatures seen here. The implications are that a linear approximation,

335 e.g. such as a Ratkowsky model, is not sufficient to describe *E. coli* growth in plant extracts,  
336 although it has been used to model growth on plants (43, 60, 61).

337 In conclusion, growth potential *in planta* was described in part, by growth rates in plant  
338 extracts, but only for sprouted seeds. On the other hand, biofilm formation in plant extracts  
339 showed some relation to *in planta* colonisation in leafy vegetables. Plant species- and tissue-  
340 type dependent differences in metabolites meant that no single metabolite could be correlated  
341 with growth, and the only positive association was with the combined group of saccharides.  
342 The marked differences in *in planta* colonisation between the sprouted seeds and leafy  
343 vegetables reinforces the higher risk associated with very young plants, grown under  
344 conditions conducive for bacterial growth (72). Therefore, although this data can inform hazard  
345 identification and risk analyses, it is evident that important specificities within each plant-  
346 microbe system need to be considered, and it is not possible to take a generalised view of  
347 STEC-plant colonisation.

348

## 349 Materials and Methods

### 350 Bacteria and media

351 The bacterial isolates panel comprised five isolates: two *E. coli* O157:H7 isolates, two  
352 environmental *E. coli* isolates and an *E. coli* K-12 isolate (Table 1). *E. coli* ZAP1589 is a Stx  
353 negative derivative, generated from isolate H110320350 (Methods SM3). Motility of isolate  
354 ZAP1589 and isolate H110320350 was tested on motility agar (0.7 %), and presence of the H7  
355 flagella was confirmed by agglutination with the monoclonal H7 antibody.

356 Bacteria were cultured overnight in Lysogeny-broth medium (LB) at 37 °C (2, 3), with shaking  
357 at 200 rpm. Prior to experimentation an aliquot of the overnight culture was inoculated 1:100 in  
358 rich defined 3-(N-morpholino)propanesulfonic acid (MOPS) medium (48) with 0.2 % glycerol  
359 and essential and non-essential amino acids, termed 'rich defined MOPS glycerol' (RDMG), for  
360 24 h at 18 °C and 200 rpm. Bacteria were collected by centrifugation, washed in phosphate  
361 buffered saline (PBS) and adjusted to the required starting optical density (OD) 600 nm. Media  
362 was supplemented with 30 µg ml<sup>-1</sup> kanamycin, if required. Defined artificial 'lettuce apoplast' or  
363 'sprout extract' media was generated by adding each group of constituents (Table 3) to a base  
364 minimal MOPs medium (MMM) lacking a carbon source and amino acids. Each component  
365 group was added at the defined concentration to represent the concentrations and composition  
366 present in lettuce apoplast or sprout extracts and by dilution of one major group at a time at:  
367 1:50 saccharides (SA), 1:10 amino acids (AA) or 1:20 organic acids (OA), while the other  
368 groups were at 1:1. The pH of the sprout defined medium was 7.2 and lettuce apoplast defined  
369 medium 7.05. Viable counts were determined from 10-fold dilutions plated on MacConkey

370 (MAC) agar, incubated overnight at 37 °C and counted manually the next day. All experiments  
371 were conducted in triplicate. Viable counts and OD<sub>600</sub> nm were plotted in Excel 2010.

### 372 Plant extracts and metabolite analysis

373 Lettuce (*Lactuca sativa*) var. All Year Round and spinach (*Spinacia oleracea*) var. Amazon  
374 were grown individually in 9 cm<sup>3</sup> pots in compost for microbiological assays, or in vermiculite  
375 for metabolite analysis, in a glasshouse for three weeks. Fenugreek (*Trigonella foenum-*  
376 *graecum*) and alfalfa (*Medicago sativa*) seeds were soaked in sterile distilled water (SDW) for  
377 3 h at room temperature (RT), surface sterilized with 3 % calcium hypochlorite (20,000 ppm ml<sup>-1</sup>  
378 active chlorite) for 15 min, washed five times with SDW and soaked for 2 h in SDW at RT.  
379 Sprouts were transferred aseptically on distilled water agar (DWA) (0.5 % agar) and sprouted  
380 for two (alfalfa) or five (fenugreek) days at 25 °C in darkness. Leaf apoplastic washings were  
381 collected as described previously (Methods SM4), optimised for spinach and lettuce to  
382 minimize cytoplasmic contamination (39). All tissue extracts were made as described  
383 previously (9). In brief, vermiculite was gently washed off the roots with tap water and rinsed  
384 with SDW. Leaves and roots were separated with a sterile scalpel, macerated in liquid nitrogen  
385 with a pestle in a mortar and stored at -20 °C until use and pre-processed for sample  
386 clarification by mixing 1 g with 20 ml SDW, soaked on a shaker for 4 h, centrifuged at 5000 rcf  
387 for 15 min, and the supernatant heated to 50 °C for 30 min. The extract was centrifuged at  
388 5000 rcf for 15 min and filter sterilised through a 0.45 µm filter for root tissue or 0.1 µm filter for  
389 leaf tissue. Sprouts were macerated in liquid nitrogen, processed as described above without a  
390 washing step to remove vermiculite, and filter sterilised through a 0.22 µm filter. Apoplast  
391 extracts were filtered sterilised through a 0.1 µm filter (Durapore, Merck, Germany). Extracts  
392 were made from ~ 5 plants per sample for leaves and roots and up to 24 plants for apolastic

393 washings or for sprouts. 10 ml plant extract samples were used for GC-MS analysis as  
394 described in Methods SM5. Lysates were prepared for HPLC described previously by  
395 Shepherd, et al. (69).

#### 396 Bacterial growth rates

397 Bacterial growth rates were determined using a pre-warmed plate reader Bioscreen C plate  
398 reader (Oy Growth Curves Ab Ltd, Finland), set to different temperatures. The *E. coli* isolates  
399 were grown as described above, adjusted to an OD<sub>600</sub> of 0.05 in PBS (~ 2.1 x 10<sup>7</sup> cfu ml<sup>-1</sup>) and  
400 inoculated at a 1:10 dilution in plant extracts (at 1:20 w/v in dH<sub>2</sub>O) or defined media (Table 3),  
401 in 200 µl total volume, in multi-well plates. Growth for the *E. coli* isolates was measured at 18,  
402 20 and 25 °C in 100-microwell plates (Honeycomb, Thermo Fisher, USA). Wells were  
403 randomised in duplicate on the plate with negatives included. All growth curves in extracts  
404 were repeated three times with four replicates on plates. Measurements were recorded every  
405 15 min for 48 hours and multi-well plates were shaken for 60 seconds pre- and post-  
406 measurement. Results were exported from plate reader proprietary software as tab-delimited  
407 files. For model fitting, 12 replicates of each isolate and medium type were averaged and  
408 converted to viable counts log (cfu h<sup>-1</sup>) (Methods SM6). A conversion factor of 4.2 x 10<sup>8</sup> cfu ml<sup>-1</sup>  
409 <sup>1</sup> was applied so that all growth curves could be modelled using DM-Fit (Methods SM1).  
410 Secondary modelling was applied for different temperature as described (Methods SM2).

#### 411 Biofilms

412 Bacterial biofilms were measured as described previously by Merritt, et al. (45). Bacteria were  
413 grown aerobically in LB at 37 °C for 12 h, sub-cultured (1:1000 v/v) in RDMG for 18 h at 18 °C,  
414 diluted in PBS to OD<sub>600</sub> of 0.05 and inoculated into plant extracts as per the growth rates

415 determination in a 96 well polystyrene plate and incubated statically for 48 h at 18 °C. The  
416 washed wells were stained with 0.1 % crystal violet solution and solubilised with 95 % ethanol.  
417 The solution was transferred into a fresh plate and absorbance measured at 590 nm with a  
418 plate reader (Multiskan Go, Thermo Scientific, USA). Results were exported with the software  
419 SkanIt™ (Thermo Scientific, USA) to Microsoft Excel 2010 for analysis.

#### 420 Plant colonisation assay

421 Lettuce and spinach plants (~ 3 weeks old) were transferred to a growth chamber (Snijders) at  
422 21 °C; 75 % humidity and 16 h light – 8 h dark cycle (400  $\mu\text{E}/\text{m}^2\cdot\text{s}$  (30.000 lux)) three days  
423 prior to inoculation and were not watered for ~ 18 h prior to inoculation. Roots were inoculated  
424 by placing pots in a plastic box containing a 1 litre suspension of *E. coli* Sakai or ZAP1589,  
425 diluted to  $\text{OD}_{600}$  of 0.02 (equivalent to  $10^7$  cfu  $\text{ml}^{-1}$ ) in SDW, which partially submerged pots.  
426 After 1 h inoculation, the pots were transferred to the growth chamber until sampling. Sprouts  
427 were inoculated with  $10^3$  cfu  $\text{ml}^{-1}$  bacteria in 0.5 l SDW for 1 h, rinsed with 0.5 x Murashige and  
428 Skoog (MS) basal medium (no sucrose), and transferred to petri dishes containing distilled  
429 water agar (DWA) (0.8 % agar) and incubated for up to three days at 25 °C. Negative controls  
430 were incubated with SDW without bacteria.

431 Lettuce and spinach roots were sampled at 0, 5, 10 and 14 days post infection (dpi),  
432 aseptically removed from aerial tissue with a sterile scalpel, the compost removed by washing  
433 with SDW, and the roots were transferred into 50 ml tubes, washed with PBS and the fresh  
434 weight determined. Sprouts were sampled at 0, 1, 2 dpi, where half were used to enumerate  
435 the total viable counts of *E. coli* and stored in PBS until further use (~ 30 min), and surface-  
436 associated bacteria were removed from the other half of the samples by surface sterilization

437 with 200 ppm  $\text{Ca}(\text{ClO})_2$  for lettuce/spinach roots or 20,000 ppm  $\text{Ca}(\text{ClO})_2$  for sprouts, for 15  
438 min. Surface decontamination of sprout tissue required at least 15,000 ppm of  $\text{Ca}(\text{ClO})_2$  to  
439 eradicate external *E. coli*, but endophytes appeared to be protected from the active chlorite  
440 since endemic internalised bacteria occurred on recovery media after surface decontamination  
441 with 20,000 ppm  $\text{Ca}(\text{ClO})_2$ . The root/sprouts were washed five times with PBS to ensure  
442 removal of all loosely adherent bacterial cells and residual chlorine. Surface sterilisation was  
443 validated as described (73). Any samples containing surface-associated bacterial colonies  
444 were removed from subsequent analysis. Roots/sprouts were macerated using mortar and  
445 pestle in 2 ml PBS and ~ 50 mg sterile sand. The supernatant was diluted once for spinach  
446 and lettuce (1:1), three times for fenugreek (1:3) or four times for alfalfa (1:4) with PBS and  
447 100  $\mu\text{l}$  plated on MAC plates using a spiral plater (WASP, Don Whitley Scientific, UK) and  
448 incubated for 24 h at 37 °C. Plates were counted using a counting grid (WASP, Don Whitley  
449 Scientific, UK), multiplied by the dilution factor and converted to  $\text{cfu ml}^{-1}$ . The experiment was  
450 repeated three times with five replicate samples per time point, and sprout samples comprised  
451 multiple (> 15) sprouts. The limit of detection from direct plating was 20  $\text{cfu ml}^{-1}$ , below which  
452 values were manually levelled to < 1 log ( $\text{cfu ml}^{-1}$ ) for lettuce and spinach root data. Since the  
453 level of inoculation of sprouts for day 0 was below the detection limit, the numbers were semi-  
454 quantified by most probable number (MPN) method for 3 tube assay as described by Oblinger  
455 and Koburger (49). Samples were diluted 6-fold in buffered peptone water (BPW) and  
456 incubated overnight at 37 °C, and positive samples confirmed by plating triplicate 100  $\mu\text{l}$   
457 samples on MAC agar and incubating overnight at 37 °C.

458

459

460 **Acknowledgments**

461 NJH and SM were supported by a FSA grant (FS101056); BM was supported by a PhD award  
462 to NJH, NS, FB and KF; NJH was partly funded by the Rural & Environment Science &  
463 Analytical Services Division of the Scottish Government. We are grateful to Susan Verrall and  
464 Raymond Campbell (Hutton institute) for assistance with GC-MS and HPLC; David Gally  
465 (University of Edinburgh) for use of CL3 facilities.

466 **Conflict of interest disclosure**

467 The authors declare no conflicts of interest.

468



## 469 References

- 470 1. **Baumler, D. J., R. G. Peplinski, J. L. Reed, J. D. Glasner, and N. T. Perna.** 2011. The  
471 evolution of metabolic networks of *E. coli*. *BMC Syst. Biol.* **5**:21.
- 472 2. **Bertani, G.** 2004. Lysogeny at Mid-Twentieth Century: P1, P2, and Other Experimental  
473 Systems. *J Bacteriol* **186**:595-600.
- 474 3. **Bertani, G.** 1951. Studies on lysogenesis. The mode of phage liberation by lysogenic  
475 *Escherichia coli*. *J. Bacteriol.* **62**:293-300.
- 476 4. **Bewley, J. D., and M. Black.** 1978. Physiology and Biochemistry of Seeds in Relation to  
477 Germination: 1 Development, Germination, and Growth. Springer-Verlag Berlin Heidelberg.
- 478 5. **Buchanan, R. L., and L. A. Klawitter.** 1992. The effect of incubation temperature, initial pH,  
479 and sodium chloride on the growth kinetics of *Escherichia coli* O157:H7. *Food Microbiol* **9**:185-  
480 196.
- 481 6. **Buchholz, U., H. Bernard, D. Werber, M. M. Bohmer, C. Remschmidt, H. Wilking, Y. Delere,**  
482 **M. an der Heiden, C. Adlhoch, J. Dreesman, J. Ehlers, S. Ethelberg, M. Faber, C. Frank, G.**  
483 **Fricke, M. Greiner, M. Hohle, S. Ivarsson, U. Jark, M. Kirchner, J. Koch, G. Krause, P.**  
484 **Luber, B. Rosner, K. Stark, and M. Kuhne.** 2011. German outbreak of *Escherichia coli*  
485 O104:H4 associated with sprouts. *N Engl J Med* **365**:1763-70.
- 486 7. **Carter, M. Q., J. W. Louie, D. Feng, W. Zhong, and M. T. Brandl.** 2016. Curli fimbriae are  
487 conditionally required in *Escherichia coli* O157:H7 for initial attachment and biofilm formation.  
488 *Food Microbiol* **57**:81-89.
- 489 8. **Charkowski, A. O., J. D. Barak, C. Z. Sarreal, and R. E. Mandrell.** 2002. Differences in  
490 growth of *Salmonella enterica* and *Escherichia coli* O157 : H7 on alfalfa sprouts. *Appl Environ*  
491 *Microbiol* **68**:3114-3120.
- 492 9. **Crozier, L., P. Hedley, J. Morris, C. Wagstaff, S. C. Andrews, I. Toth, R. W. Jackson, and N.**  
493 **Holden.** 2016. Whole-transcriptome analysis of verocytotoxigenic *Escherichia coli* O157:H7

- 494 (Sakai) suggests plant-species-specific metabolic responses on exposure to spinach and lettuce  
495 extracts. *Front Microbiol* **7**:1088.
- 496 10. **Dahan, S., S. Knutton, R. K. Shaw, V. F. Crepin, G. Dougan, and G. Frankel.** 2004.  
497 Transcriptome of enterohemorrhagic *Escherichia coli* O157 adhering to eukaryotic plasma  
498 membranes. *Infect Immun* **72**:5452-9.
- 499 11. **Danhorn, T., and C. Fuqua.** 2007. Biofilm formation by plant-associated bacteria. *Annu Rev*  
500 *Microbiol* **61**:401-22.
- 501 12. **Danyluk, M. D., and D. W. Schaffner.** 2011. Quantitative assessment of the microbial risk of  
502 leafy greens from farm to consumption: preliminary framework, data, and risk estimates. *J Food*  
503 *Prot* **74**:700-708.
- 504 13. **Deering, A. J., L. J. Mauer, and R. E. Pruitt.** 2012. Internalization of *E. coli* O157:H7 and  
505 *Salmonella* spp. in plants: A review. *Food Res Int* **45**:567–575.
- 506 14. **Dobson, G., T. Shepherd, R. Marshall, S. R. Verrall, S. Conner, D. W. Griffiths, J. W.**  
507 **McNicol, D. Stewart, and H. V. Davies.** 2007. Dordrecht.
- 508 15. **Elhadidy, M., and A. Álvarez-Ordóñez.** 2016. Diversity of survival patterns among *Escherichia*  
509 *coli* O157:H7 genotypes subjected to food-related stress conditions. *Front Microbiol* **7**.
- 510 16. **Erickson, M. C., J. Liao, A. S. Payton, C. C. Webb, L. Ma, G. D. Zhang, I. Flitcroft, M. P.**  
511 **Doyle, and L. R. Beuchat.** 2013. Fate of *Escherichia coli* O157:H7 and *Salmonella* in soil and  
512 lettuce roots as affected by potential home gardening practices. *J Sci Food Agri* **93**:3841-3849.
- 513 17. **Erickson, M. C., C. C. Webb, L. E. Davey, A. S. Payton, I. D. Flitcroft, and M. P. Doyle.**  
514 2014. Biotic and abiotic variables affecting internalization and fate of *Escherichia coli* O157:H7  
515 isolates in leafy green roots. *J Food Prot* **77**:872-9.
- 516 18. **Erickson, M. C., C. C. Webb, J. C. Diaz-Perez, L. E. Davey, A. S. Payton, I. D. Flitcroft, S. C.**  
517 **Phatak, and M. P. Doyle.** 2013. Internalization of *Escherichia coli* O157:H7 following spraying  
518 of cut shoots when leafy greens are regrown for a second crop. *J Food Prot* **76**:2052-2056.

- 519 19. **Erickson, M. C., C. C. Webb, J. C. Diaz-Perez, S. C. Phatak, J. J. Silvoy, L. Davey, A. S.**  
520 **Payton, J. Liao, L. Ma, and M. P. Doyle.** 2010. Infrequent internalization of *Escherichia coli*  
521 O157:H7 into field-grown leafy greens. *J Food Prot* **73**:500-506.
- 522 20. **Erlacher, A., M. Cardinale, M. Grube, and G. Berg.** 2015. Biotic stress shifted structure and  
523 abundance of *Enterobacteriaceae* in the lettuce microbiome. *PLoS One* **10**.
- 524 21. **Franz, E., S. O. Tromp, H. Rijgersberg, and H. J. van der Fels-Klerx.** 2010. Quantitative  
525 microbial risk assessment for *Escherichia coli* O157:H7, *Salmonella*, and *Listeria*  
526 monocytogenes in leafy green vegetables consumed at salad bars. *J Food Prot* **73**:274-285.
- 527 22. **George, S. M., A. Métris, and J. Baranyi.** 2015. Integrated kinetic and probabilistic modeling of  
528 the growth potential of bacterial populations. *Appl Environ Microbiol* **81**:3228-3234.
- 529 23. **Gibson, A. M., N. Bratchell, and T. A. Roberts.** 1988. Predicting microbial growth: growth  
530 responses of *salmonellae* in a laboratory medium as affected by pH, sodium chloride and  
531 storage temperature. *Int J Food Microbiol* **6**:155-78.
- 532 24. **Hayashi, K., N. Morooka, Y. Yamamoto, K. Fujita, K. Isono, S. Choi, E. Ohtsubo, T. Baba,**  
533 **B. L. Wanner, H. Mori, and T. Horiuchi.** 2006. Highly accurate genome sequences of  
534 *Escherichia coli* K-12 strains MG1655 and W3110. *Molecular Systems Biology* **2**:2006.0007.
- 535 25. **Holden, N., R. W. Jackson, and A. Schikora.** 2015. Plants as alternative hosts for human and  
536 animal pathogens. *Front Microbiol* **6**.
- 537 26. **Holden, N., L. Pritchard, and I. Toth.** 2009. Colonization outwith the colon: plants as an  
538 alternative environmental reservoir for human pathogenic enterobacteria. *FEMS Microbiol Rev*  
539 **33**:689-703.
- 540 27. **Holden, N. J., F. Wright, K. MacKenzie, J. Marshall, S. Mitchell, A. Mahajan, R. Wheatley,**  
541 **and T. J. Daniell.** 2013. Prevalence and diversity of *Escherichia coli* isolated from a barley trial  
542 supplemented with bulky organic soil amendments: green compost and bovine slurry. *Lett Appl*  
543 *Microbiol* **58**:205–212.

- 544 28. **Hou, Z., R. C. Fink, C. Radtke, M. J. Sadowsky, and F. Diez-Gonzalez.** 2013. Incidence of  
545 naturally internalized bacteria in lettuce leaves. *Int J Food Microbiol* **162**:260-265.
- 546 29. **Huang, L.** 2012. Mathematical modeling and numerical analysis of the growth of non-O157  
547 Shiga toxin-producing *Escherichia coli* in spinach leaves. *Int J Food Microbiol* **160**:32-41.
- 548 30. **Jay, M. T., M. B. Cooley, D. Carychao, G. W. Wiscomb, R. A. Sweitzer, L. Crawford-Miksza,  
549 J. A. Farrar, D. K. Lau, J. O'Connell, A. Millington, R. V. Asmundson, E. R. Atwill, and R. E.  
550 Mandrell.** 2007. *Escherichia coli* O157:H7 in feral swine near spinach fields and cattle, central  
551 California coast. *Emerg Infect Dis* **13**:1908-11.
- 552 31. **Jensen, D. A., L. M. Friedrich, L. J. Harris, M. D. Danyluk, and D. W. Schaffner.** 2015. Cross  
553 contamination of *Escherichia coli* O157:H7 between lettuce and wash water during home-scale  
554 washing. *Food Microbiol* **46**:428-33.
- 555 32. **Jensen, D. A., L. M. Friedrich, L. J. Harris, M. D. Danyluk, and D. W. Schaffner.** 2013.  
556 Quantifying transfer rates of *Salmonella* and *Escherichia coli* O157:H7 between fresh-cut  
557 produce and common kitchen surfaces. *J Food Prot* **76**:1530-8.
- 558 33. **Klerks, M. M., E. Franz, M. van Gent-Pelzer, C. Zijlstra, and A. H. van Bruggen.** 2007.  
559 Differential interaction of *Salmonella enterica* serovars with lettuce cultivars and plant-microbe  
560 factors influencing the colonization efficiency. *ISME J* **1**:620-31.
- 561 34. **Koseki, S., and S. Isobe.** 2005. Prediction of pathogen growth on iceberg lettuce under real  
562 temperature history during distribution from farm to table. *Int J Food Microbiol* **104**:239-248.
- 563 35. **Koukkidis, G., R. Haigh, N. Allcock, S. Jordan, and P. Freestone.** 2017. Salad leaf juices  
564 enhance *Salmonella* growth, colonization of fresh produce, and virulence. *Appl Environ*  
565 *Microbiol* **83**.
- 566 36. **Leveau, J. H. J., and S. E. Lindow.** 2001. Appetite of an epiphyte: Quantitative monitoring of  
567 bacterial sugar consumption in the phyllosphere. *Proc Natl Acad Sci USA* **98**:3446-3453.

- 568 37. **Li, B.-H., X.-F. Ma, X.-D. Wu, and W.-X. Tian.** 2006. Inhibitory activity of chlorogenic acid on  
569 enzymes involved in the fatty acid synthesis in animals and bacteria. *IUBMB life* **58**:39-46.
- 570 38. **Linden, I. V. d., B. Cottyn, M. Uyttendaele, G. Vlaemynck, M. Heyndrickx, M. Maes, and N.**  
571 **Holden.** 2016. Microarray-based screening of differentially expressed genes of *E. coli* O157:H7  
572 Sakai during preharvest survival on butterhead lettuce. *Agriculture* **6**:6.
- 573 39. **Lohaus, G., K. Pennewiss, B. Sattelmacher, M. Hussmann, and K. Hermann Muehling.**  
574 2001. Is the infiltration-centrifugation technique appropriate for the isolation of apoplastic fluid?  
575 A critical evaluation with different plant species. *Physiologia Plantarum* **111**:457-465.
- 576 40. **Marshall, J., Y. Rossez, G. Mainda, D. L. Gally, T. Daniell, and N. Holden.** 2016. Alternate  
577 thermoregulation and functional binding of *Escherichia coli* Type 1 fimbriae in environmental  
578 and animal isolates. *FEMS Microbiol Lett* DOI: **10.1093/femsle/fnw251**.
- 579 41. **Mayer, C., and W. Boos.** 2005. Hexose/pentose and hexitol/pentitol metabolism. *EcoSal Plus*.
- 580 42. **McKellar, R. C., and P. Delaquis.** 2011. Development of a dynamic growth-death model for  
581 *Escherichia coli* O157:H7 in minimally processed leafy green vegetables. *Int. J. Food Microbiol.*  
582 **151**:7-14.
- 583 43. **McKellar, R. C., and X. Lu.** 2004. Modeling microbial responses in food. CRC Press LLC,  
584 Florida, USA.
- 585 44. **Melotto, M., S. Panchal, and D. Roy.** 2014. Plant innate immunity against human bacterial  
586 pathogens. *Front Microbiol* **5**:411.
- 587 45. **Merritt, J. H., D. E. Kadouri, and G. A. O'Toole.** 2005. Growing and analyzing static biofilms,  
588 p. 1B.1.1-1B.1.17, *Curr Prot Microbiol*.
- 589 46. **Miller, W. G., M. T. Brandl, B. Quiñones, and S. E. Lindow.** 2001. Biological sensor for  
590 sucrose availability: relative sensitivities of various reporter genes. *Appl Environ Microbiol*  
591 **67**:1308-1317.

- 592 47. **Mou, B.** 2008. Evaluation of oxalate concentration in the U.S. spinach germplasm collection.  
593 HortScience **43**:1690-1693.
- 594 48. **Neidhardt, F. C., P. L. Bloch, and D. F. Smith.** 1974. Culture medium for enterobacteria. J  
595 Bacteriol **119**:736-47.
- 596 49. **Oblinger, J. L., and J. A. Koburger.** 1975. Understanding and teaching the most probable  
597 number technique. J Milk Food Technol **38**:540-545.
- 598 50. **Painter, J. A., R. M. Hoekstra, T. Ayers, R. V. Tauxe, C. R. Braden, F. J. Angulo, and P. M.**  
599 **Griffin.** 2013. Attribution of foodborne illnesses, hospitalizations, and deaths to food  
600 commodities by using outbreak data, United States, 1998-2008. Emerg Infect Dis **19**:407-15.
- 601 51. **Pang, H., E. Lambertini, R. L. Buchanan, D. W. Schaffner, and A. K. Pradhan.** 2017.  
602 Quantitative microbial risk assessment for *Escherichia coli* O157:H7 in fresh-cut lettuce. J Food  
603 Prot **80**:302-311.
- 604 52. **Perez-Rodriguez, F., M. J. Saiz-Abajo, R. M. Garcia-Gimeno, A. Moreno, D. Gonzalez, and**  
605 **A. I. Vitas.** 2014. Quantitative assessment of the *Salmonella* distribution on fresh-cut leafy  
606 vegetables due to cross-contamination occurred in an industrial process simulated at laboratory  
607 scale. Int J Food Microbiol **184**:86-91.
- 608 53. **Perry, N., T. Cheasty, T. Dallman, N. Launder, and G. Willshaw.** 2013. Application of multi-  
609 locus variable number tandem repeat analysis to monitor Verocytotoxin-producing *Escherichia*  
610 *coli* O157 phage type 8 in England and Wales: emergence of a profile associated with a national  
611 outbreak. J Appl Microbiol **115**:1052–1058.
- 612 54. **Pignocchi, C., and C. H. Foyer.** 2003. Apoplasmic ascorbate metabolism and its role in the  
613 regulation of cell signalling. Curr. Opin. Plant Biol. **6**:379-89.
- 614 55. **Posada-Izquierdo, G., S. Del Rosal, A. Valero, G. Zurera, A. S. Sant'Ana, V. O. Alvarenga,**  
615 **and F. Perez-Rodriguez.** 2016. Assessing the growth of *Escherichia coli* O157:H7 and

- 616 Salmonella in spinach, lettuce, parsley and chard extracts at different storage temperatures. J  
617 Appl Microbiol **120**:1701-1710.
- 618 56. **Posada-Izquierdo, G. D., F. Perez-Rodriguez, F. Lopez-Galvez, A. Allende, M. I. Gil, and G.**  
619 **Zurera.** 2014. Modeling growth of *Escherichia coli* O157:H7 in fresh-cut lettuce treated with  
620 neutral electrolyzed water and under modified atmosphere packaging. Int J Food Microbiol  
621 **177**:1-8.
- 622 57. **Presser, K. A., D. A. Ratkowsky, and T. Ross.** 1997. Modelling the growth rate of *Escherichia*  
623 *coli* as a function of pH and lactic acid concentration. Appl Environ Microbiol **63**:2355-2360.
- 624 58. **Presser, K. A., T. Ross, and D. A. Ratkowsky.** 1998. Modelling the growth limits (growth/no  
625 growth interface) of *Escherichia coli* as a function of temperature, pH, lactic acid concentration,  
626 and water activity. Appl Environ Microbiol **64**:1773-1779.
- 627 59. **Quilliam, R. S., A. P. Williams, and D. L. Jones.** 2012. Lettuce cultivar mediates both  
628 phyllosphere and rhizosphere activity of *Escherichia coli* O157:H7. PLoS ONE **7**:e33842.
- 629 60. **Ratkowsky, D. A., R. K. Lowry, T. A. McMeekin, A. N. Stokes, and R. E. Chandler.** 1983.  
630 Model for bacterial culture growth rate throughout the entire biokinetic temperature range. J  
631 Bacteriol **154**:1222-1226.
- 632 61. **Ratkowsky, D. A., J. Olley, T. A. McMeekin, and A. Ball.** 1982. Relationship between  
633 temperature and growth rate of bacterial cultures. J Bacteriol **149**:1-5.
- 634 62. **Record Jr, M. T., E. S. Courtenay, D. S. Cayley, and H. J. Guttman.** 1998. Responses of *E.*  
635 *coli* to osmotic stress: large changes in amounts of cytoplasmic solutes and water. Trends in  
636 Biochemical Sciences **23**:143-148.
- 637 63. **Rico, A., and G. M. Preston.** 2008. *Pseudomonas syringae* pv. *tomato* DC3000 uses  
638 constitutive and apoplast-induced nutrient assimilation pathways to catabolize nutrients that are  
639 abundant in the tomato apoplast. Mol Plant Microbe Interact **21**:269-282.

- 640 64. **Rossez, Y., A. Holmes, H. Lodberg-Pedersen, L. Birse, J. Marshall, W. G. T. Willats, I. K.**  
641 **Toth, and N. J. Holden.** 2014. *Escherichia coli* common pilus (ECP) targets arabinosyl residues  
642 in plant cell walls to mediate adhesion to fresh produce plants. *J Biol Chem* **289**:34349-34365.
- 643 65. **Rossez, Y., A. Holmes, E. B. Wolfson, D. L. Gally, A. Mahajan, H. L. Pedersen, W. G. T.**  
644 **Willats, I. K. Toth, and N. J. Holden.** 2014. Flagella interact with ionic plant lipids to mediate  
645 adherence of pathogenic *Escherichia coli* to fresh produce plants. *Environ Microbiol* **16**:2181–  
646 2195.
- 647 66. **Sattelmacher, B.** 2001. The apoplast and its significance for plant mineral nutrition. *New Phytol*  
648 **149**:167-192.
- 649 67. **Seo, S., and K. R. Matthews.** 2014. Exposure of *Escherichia coli* O157:H7 to soil, manure, or  
650 water influences its survival on plants and initiation of plant defense response. *Food Microbiol*  
651 **38**:87-92.
- 652 68. **Seo, S., and K. R. Matthews.** 2012. Influence of the plant defense response to *Escherichia coli*  
653 O157:H7 cell surface structures on survival of that enteric pathogen on plant surfaces. *Appl*  
654 *Environ Microbiol* **78**:5882-5889.
- 655 69. **Shepherd, L. V., J. W. McNicol, R. Razzo, M. A. Taylor, and H. V. Davies.** 2006. Assessing  
656 the potential for unintended effects in genetically modified potatoes perturbed in metabolic and  
657 developmental processes. Targeted analysis of key nutrients and anti-nutrients. *Transgenic*  
658 *research* **15**:409-25.
- 659 70. **Vital, M., D. Stucki, T. Egli, and F. Hammes.** 2010. Evaluating the growth potential of  
660 pathogenic bacteria in water. *Appl Environ Microbiol* **76**:6477-6484.
- 661 71. **Wallace, R. J.** 2004. Antimicrobial properties of plant secondary metabolites. *The Proceedings*  
662 *of the Nutrition Society* **63**:621-9.



- 663 72. **Wright, K. M., S. Chapman, K. McGeachy, S. Humphris, E. Campbell, I. K. Toth, and N. J.**  
664 **Holden.** 2013. The endophytic lifestyle of *Escherichia coli* O157:H7: quantification and internal  
665 localization in roots. *Phytopathol* **103**:333-340.
- 666 73. **Wright, K. M., L. Crozier, J. Marshall, B. Merget, A. Holmes, and N. J. Holden.** 2017.  
667 Differences in internalization and growth of *Escherichia coli* O157:H7 within the apoplast of  
668 edible plants, spinach and lettuce, compared with the model species *Nicotiana benthamiana*.  
669 *Microb Biotechnol* **10**:555–569
- 670 74. **Wright, K. M., and N. J. Holden.** 2018. Quantification and colonisation dynamics of *Escherichia*  
671 *coli* O157:H7 inoculation of microgreens species and plant growth substrates. *Int J Food*  
672 *Microbiol* **273**:1-10.
- 673 75. **Zheng, Y., J. Liu, M. L. Cao, J. M. Deng, and J. Kou.** 2016. Extrication process of chlorogenic  
674 acid in Crofton weed and antibacterial mechanism of chlorogenic acid on *Escherichia coli*.  
675 *J.Environ.Biol.* **37**:1049-1055.
- 676
- 677

## 678 Tables and Figures

### 679 Tables

#### 680 **Table 1** Bacterial isolates used in this study

681 ST = sequence type, Stx = Shiga toxin presence, nd = not determined, n/a = not applicable.

682 Isolate Sakai used here is the *stx*-inactivated derivative (10). \* Isolate ZAP1589, derived from

683 H110320350 (Perry et al., 2013) has both *stx*-encoding regions removed, and is H7 positive

684 but non-motile.

| Isolate Name | Serotype | ST   | Stx      | Source          | Reference |
|--------------|----------|------|----------|-----------------|-----------|
| MG1655       | OR:H48   | 98   | n/a      | faecal/lab      | (24)      |
| JHI5025      | nd       | 2055 | n/a      | soil            | (27)      |
| JHI5039      | nd       | 2303 | n/a      | root            | (27)      |
| Sakai        | O157:H7  | 11   | negative | sprout /        | (10)      |
| ZAP1589      | O157:H7  | 11   | negative | leek / clinical | (53)*     |

685

#### 686 **Table 2** Quantification of saccharides from plant extracts

687 Concentrations of mono- and disaccharides determined by HPLC ( $\mu\text{g mg}^{-1}$ ). ND – not

688 detected.

|           | glucose        | fructose       | sucrose        | arabinose |
|-----------|----------------|----------------|----------------|-----------|
| fenugreek | 24.5 $\pm$ 3.1 | 24.9 $\pm$ 3.7 | 75.6 $\pm$ 6.3 | ND        |

|                      |            |             |             |               |
|----------------------|------------|-------------|-------------|---------------|
| alfalfa              | 35.4 ± 0.8 | 35.8 ± 18.6 | 3.5 ± 0.3   | ND            |
| lettuce apoplast     | 19.4 ± 1.8 | 23.4 ± 2.8  | 53.4 ± 20.7 | 0.226 ± 0.001 |
| lettuce leaf lysates | 10.7 ± 0.3 | 14.6 ± 0.4  | 50.1 ± 3.1  | ND            |
| lettuce root lysates | 9.9 ± 0.1  | 20.0 ± 0.9  | 22.5 ± 0.4  | ND            |
| spinach apoplast     | 11.8 ± 2.0 | 8.0 ± 1.7   | 38.3 ± 7.0  | 0.211 ± 0.049 |
| spinach leaf         | 21.9 ± 2.9 | 6.1 ± 0.8   | 32.8 ± 2.6  | ND            |
| spinach root         | 17.4 ± 1.2 | 9.00 ± 0.9  | 29.4 ± 1.5  | ND            |

689

690 **Table 3** Composition of defined artificial media supplements

691 Concentration ( $\mu\text{g ml}^{-1}$ ) as determined by HPLC and GC-MS for the major six components in  
 692 sprout extracts (alfalfa and fenugreek combined), lettuce apoplast, used to generate defined  
 693 'artificial' media.

| <b>Metabolite</b>       | <b>Sprouts</b> | <b>Lettuce<br/>apoplast</b> |
|-------------------------|----------------|-----------------------------|
| <b>Saccharides (SA)</b> |                |                             |
| Sucrose                 | 3021.4         | 2116.2                      |
| Fructose                | 1443.4         | 926.5                       |
| Glucose                 | 1425.0         | 769.8                       |

|                              |       |       |
|------------------------------|-------|-------|
| <b>Amino acids (AA)</b>      |       |       |
| Asparagine                   | 814.3 | n/a   |
| Alanine                      | 766.1 | n/a   |
| Serine                       | 327.4 | n/a   |
| Oxoproline                   | n/a   | 63.4  |
| <b>Organic acids (OA)</b>    |       |       |
| Malic acid                   | n/a   | 194.0 |
| 2,3-dihydroxy-propanoic acid | n/a   | 143.5 |

694

695 **Table 4** Biofilm formation for reference *E. coli* isolates in plant tissue extracts. Biofilms  
 696 were formed on polystyrene multiwall plates following incubation in spinach (Sp.) and lettuce  
 697 (Lt.) extracts (apoplast; leaf; root) and rich defined MOPS medium with glycerol (RDMG) at 18  
 698 °C, for 48 hrs in static conditions. The average ( $\pm$  variance) density of crystal violet at OD<sub>590 nm</sub>  
 699 is presented.

| Treatment / Isolate | Sakai             | ZAP1589           | JHI5025           | JHI5039           | MG1655            |
|---------------------|-------------------|-------------------|-------------------|-------------------|-------------------|
| Sp. apoplast        | 0.002 $\pm$ 0.001 | 0.011 $\pm$ 0.001 | 0.372 $\pm$ 0.007 | 0.013 $\pm$ 0.000 | 0.001 $\pm$ 0.002 |

|              |               |               |               |               |               |
|--------------|---------------|---------------|---------------|---------------|---------------|
| Sp. leaf     | 0.071 ± 0.000 | 0.128 ± 0.001 | 0.218 ± 0.034 | 0.113 ± 0.001 | 0.000 ± 0.000 |
| Sp. root     | 0.173 ± 0.000 | 0.148 ± 0.017 | 0.179 ± 0.015 | 0.126 ± 0.000 | 0.013 ± 0.000 |
| Lt. apoplast | 0.000 ± 0.002 | 0.005 ± 0.000 | 0.125 ± 0.005 | 0.001 ± 0.000 | 0.000 ± 0.000 |
| Lt. leaf     | 0.000 ± 0.000 | 0.018 ± 0.001 | 0.151 ± 0.002 | 0.007 ± 0.000 | 0.001 ± 0.000 |
| Lt. root     | 0.008 ± 0.000 | 0.029 ± 0.001 | 0.066 ± 0.001 | 0.025 ± 0.000 | 0.000 ± 0.000 |
| RDMG         | 0.000 ± 0.000 | 0.000 ± 0.000 | 0.013 ± 0.000 | 0.000 ± 0.000 | 0.000 ± 0.000 |

700

701

## 702 Figure Legends

703 **Figure 1** Maximum growth rates ( $\mu$ ) of reference *E. coli* isolates in plant extracts.

704 Maximum growth rates ( $\mu$ ) were calculated using the Baranyi model for the reference *E. coli*  
705 isolates in spinach **(A)** or lettuce **(B)** aploplast (circles), leaf lysates (triangles) and root lysates  
706 (diamonds) extracts, or in alfalfa (circles) or fenugreek (triangles) sprouts lysate extracts **(C)**  
707 with RDMG (diamonds) as no-plant extract control, at 18, 20 or 25 °C. Each point is the  
708 average rate (n = 12), with standard errors indicated by bars.

709 **Figure 2** Plant extract metabolomics and grouping

710 The 60 assigned metabolites from all species and tissues are separated into amino acids,  
711 organic acids, mono- and polysaccharides and others **(A)** by their mean total response ratio  
712 (with SD indicated by bars). **(B)** Score plot of principal component 1 (31 % variance) and  
713 component 2 (19 %) for all 116 polar metabolites, for alfalfa (ALF) in red, fenugreek (FEN) in  
714 blue, spinach (SAP, SLL, SRL) green and lettuce (LAP, LLL, LRL) black.

715 **Figure 3** Maximum growth rates ( $\mu$ ) in artificial media mimicking plant extracts.

716 Maximum growths rates ( $\mu$ ) calculated using the Baranyi model for the *E. coli* isolates at 18 °C  
717 and 25 °C in media mimicking **(A)** lettuce apoplast or **(B)** sprout lysates (a mixture of alfalfa  
718 and fenugreek sprout metabolites) with specified dilutions. The base minimal MOPS medium  
719 (MMM) was supplemented with saccharides (SA), organic acids (OA) or amino acids (AA) at  
720 the dilution specified. Each point is the average rate with standard errors indicated by bars.

721 **Figure 4** Total and internalised counts for *E. coli* O157:H7 *in planta*.

722 The number of *E. coli* isolate ZAP1589 recovered from inoculation ( $10^7$  cfu ml<sup>-1</sup>) of (A) spinach  
723 (var. Amazon) or (B) lettuce (var. All Year Round) roots at 0, 5, 10 and 14 dpi.. The number of  
724 *E. coli* isolate ZAP1589 recovered from alfalfa (C) or fenugreek (D), and *E. coli* isolate Sakai  
725 recovered from alfalfa (E) or fenugreek sprouts (F), from inoculation at  $10^3$  cfu ml<sup>-1</sup>, sampled at  
726 0, 1 and 2 dpi.. Averages (lines) and individual samples counts are shown for the total (black)  
727 or internalised population (red) (n = 15: ~ 1.5 g per sample for sprouts, individual plants for  
728 spinach & lettuce). Sprout d0 data was assessed by MPN (level of detection = 0), otherwise  
729 minimum counts were manually levelled to the direct plating detection limit of 10 cfu g<sup>-1</sup> on d1.

730 **Figure 5** Comparison of *in planta* and extract growth rates for *E. coli* isolates Sakai and  
731 ZAP1589

732 Growth rates for *in planta* estimates were plotted against estimates for plant extract extracts,  
733 on a Log<sub>10</sub> cfu day<sup>-1</sup> basis for *E. coli* isolates Sakai and ZAP1589, normalised per g fresh  
734 weight for plant tissues or per ml for plant extracts. Estimates for sprouted seeds (alfalfa – Alf;  
735 fenugreek – Fen) were obtained for growth at 25 °C, and at 18 °C for spinach (Sp.) or lettuce  
736 (Lt.) tissues (apoplast – A; leaves – L; roots – R).

737 **Supplemental Figure 1** Manual correction of growth rate misfits in DMFIT.

738 Example of a correction with *E. coli* isolate JHI5039 grown in lettuce leaf lysate, 18 °C. **A)**  
739 DMFIT could not fit a non-linear curve on data (n = 193) with a decrease in the stationary  
740 phase ( $R^2_{adj} = 0.001$ ). **B)** Data was cut off manually (n = 49) to achieve better fits ( $R^2_{adj} =$   
741 0.996). A complete list of fits including data points are in Supplemental Table 3.

742 **Supplemental Figure 2** Simplified polar metabolic pathways in plants

743 Interaction between major polar pathways (colour coded) in green leafy plants. Metabolism of  
744 carbohydrates degradation (green) is linked to amino acid degradation (dark blue and purple),  
745 which feed into the TCA cycle (red). The arrows pointing outside are entries into the non-polar  
746 fatty acid pathway. The glutamate group (orange) leads into the urea cycle. The light blue  
747 cycle described the acyl chain synthesis. Modified from the metabolomic pathway in *Solanum*,  
748 based on Dobson, et al. (14).

749

750



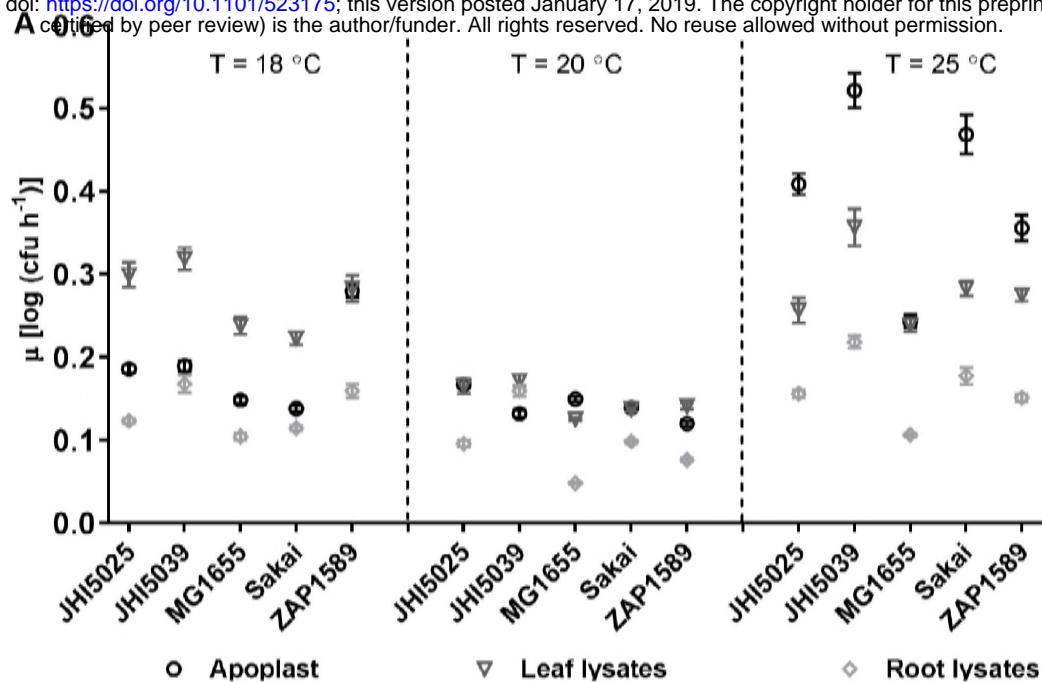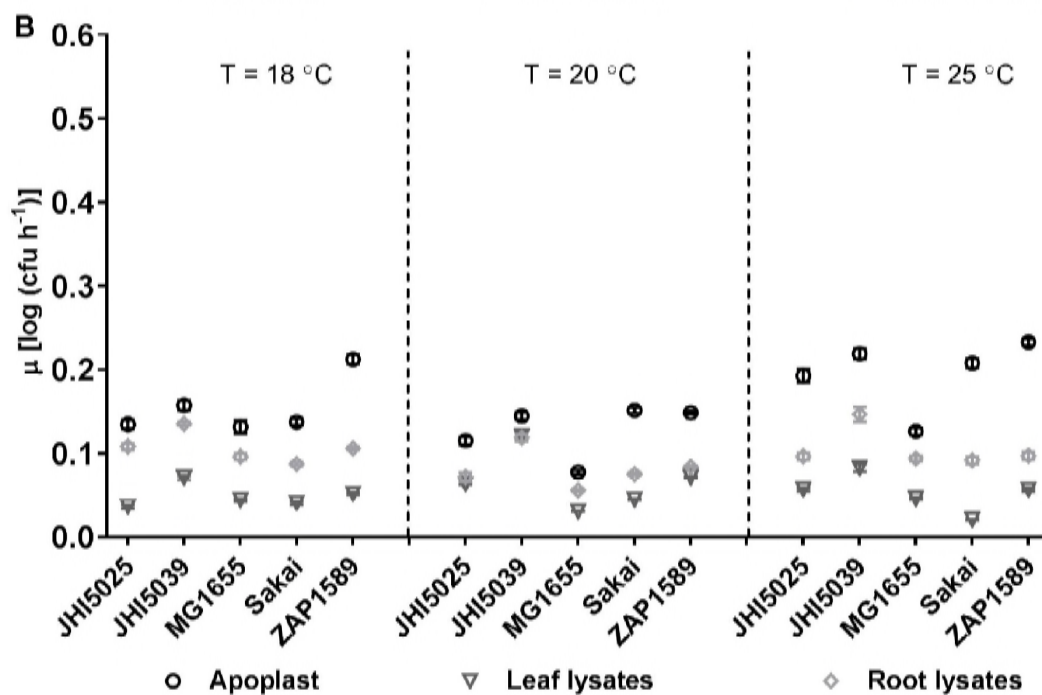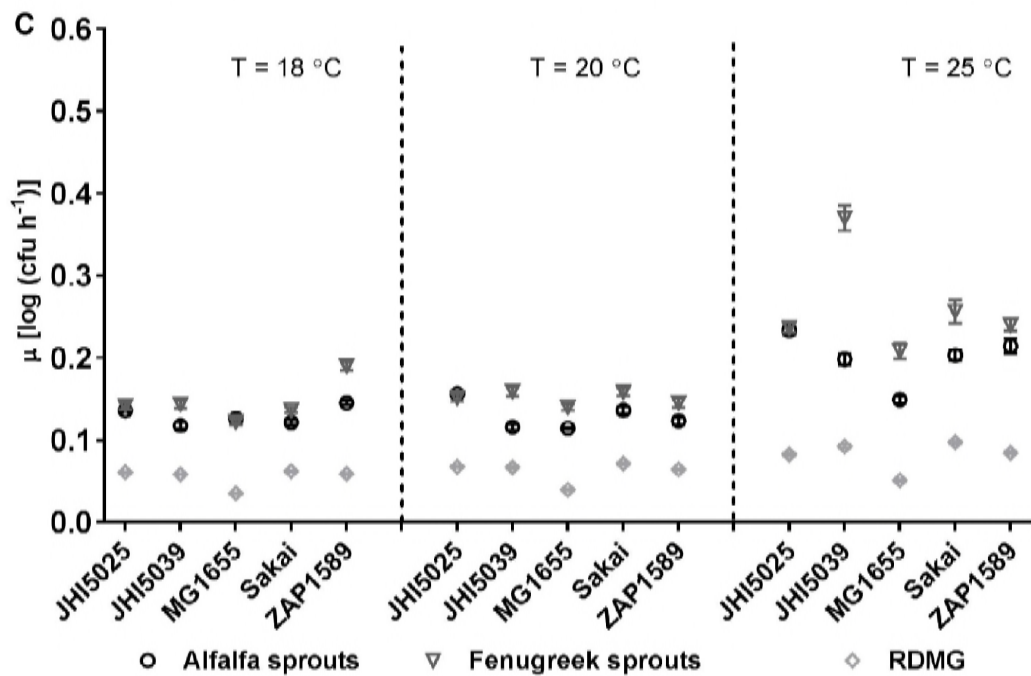



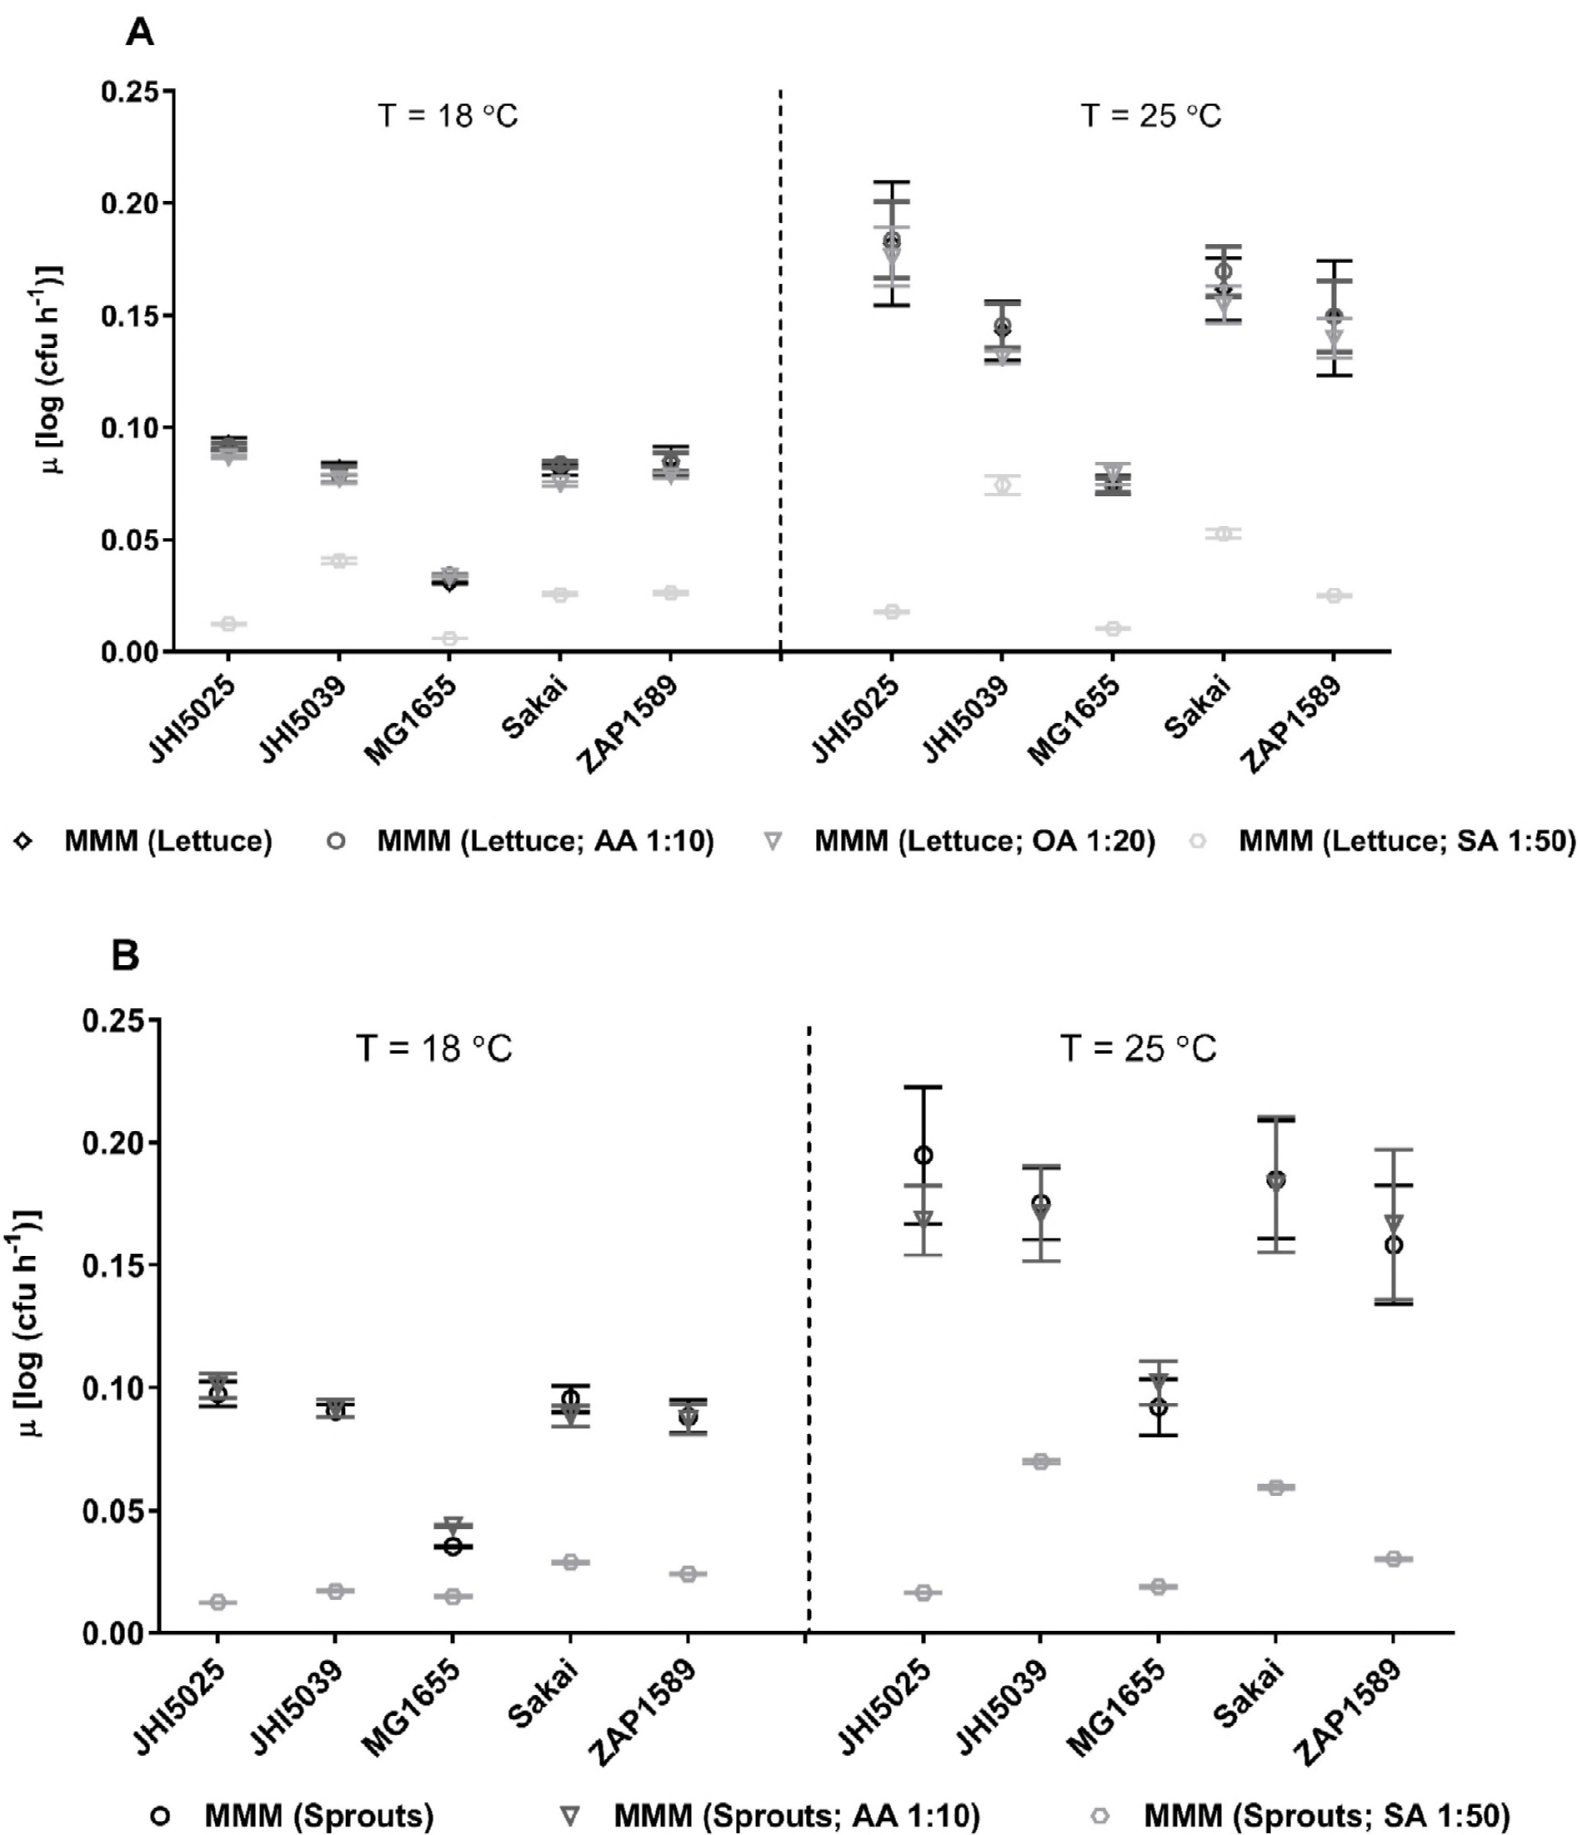

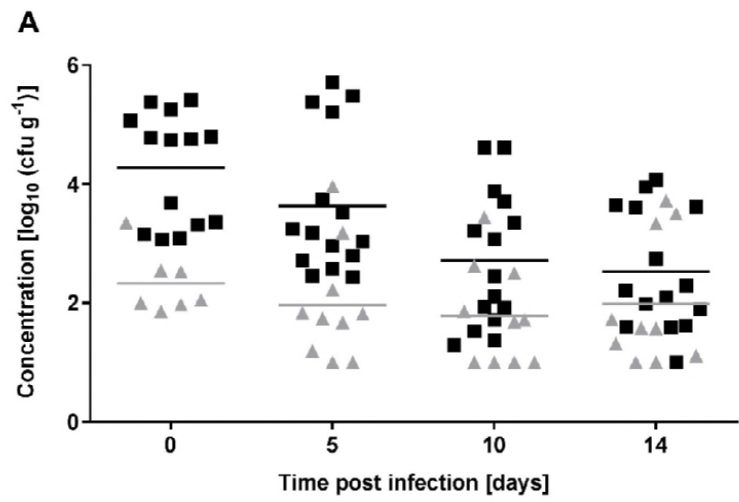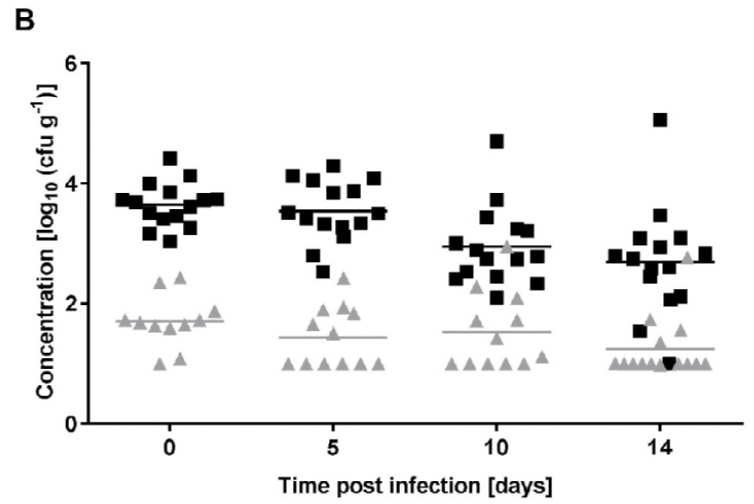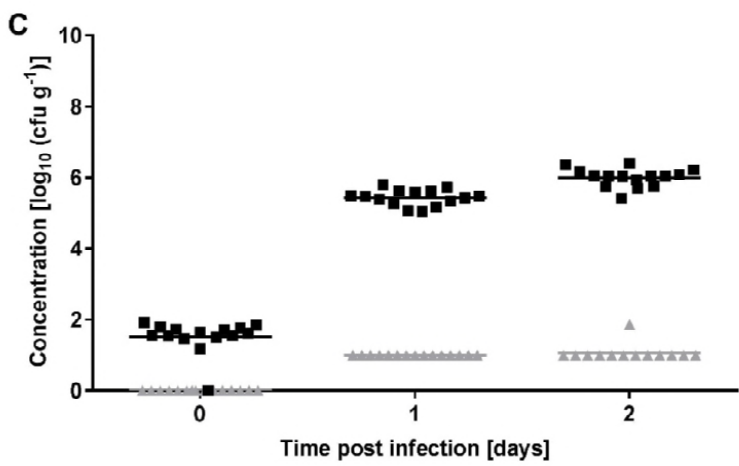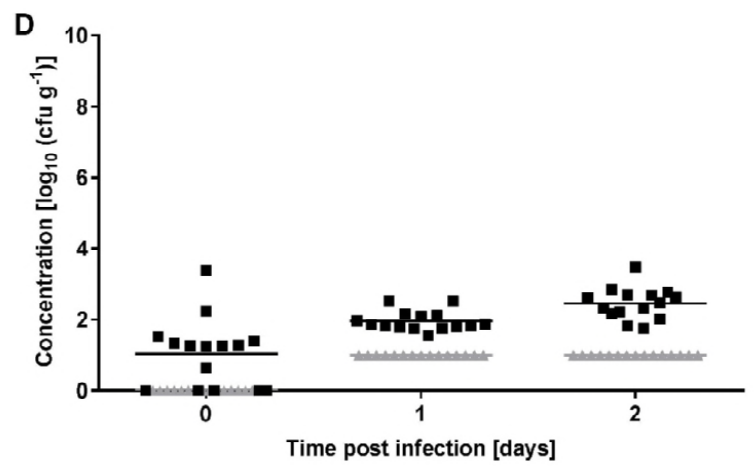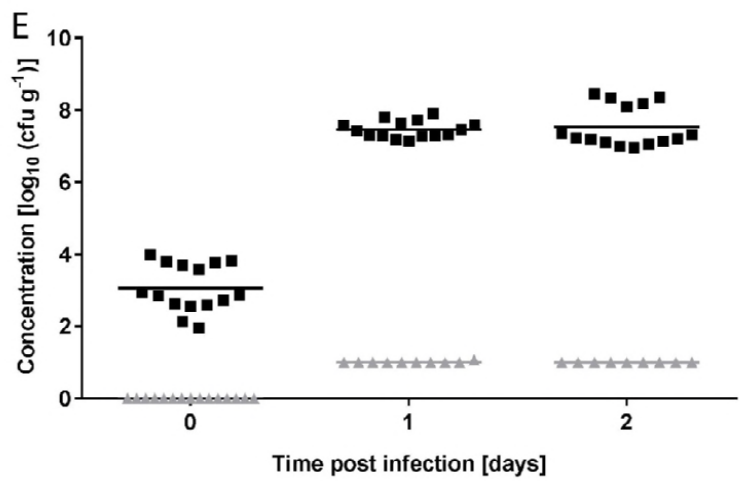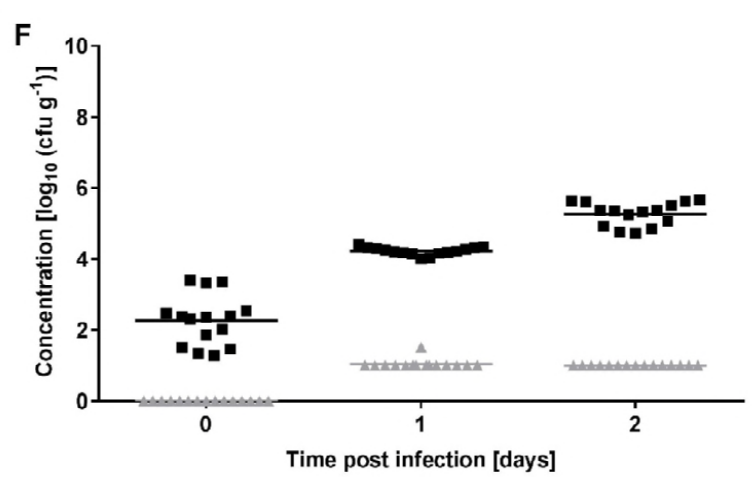

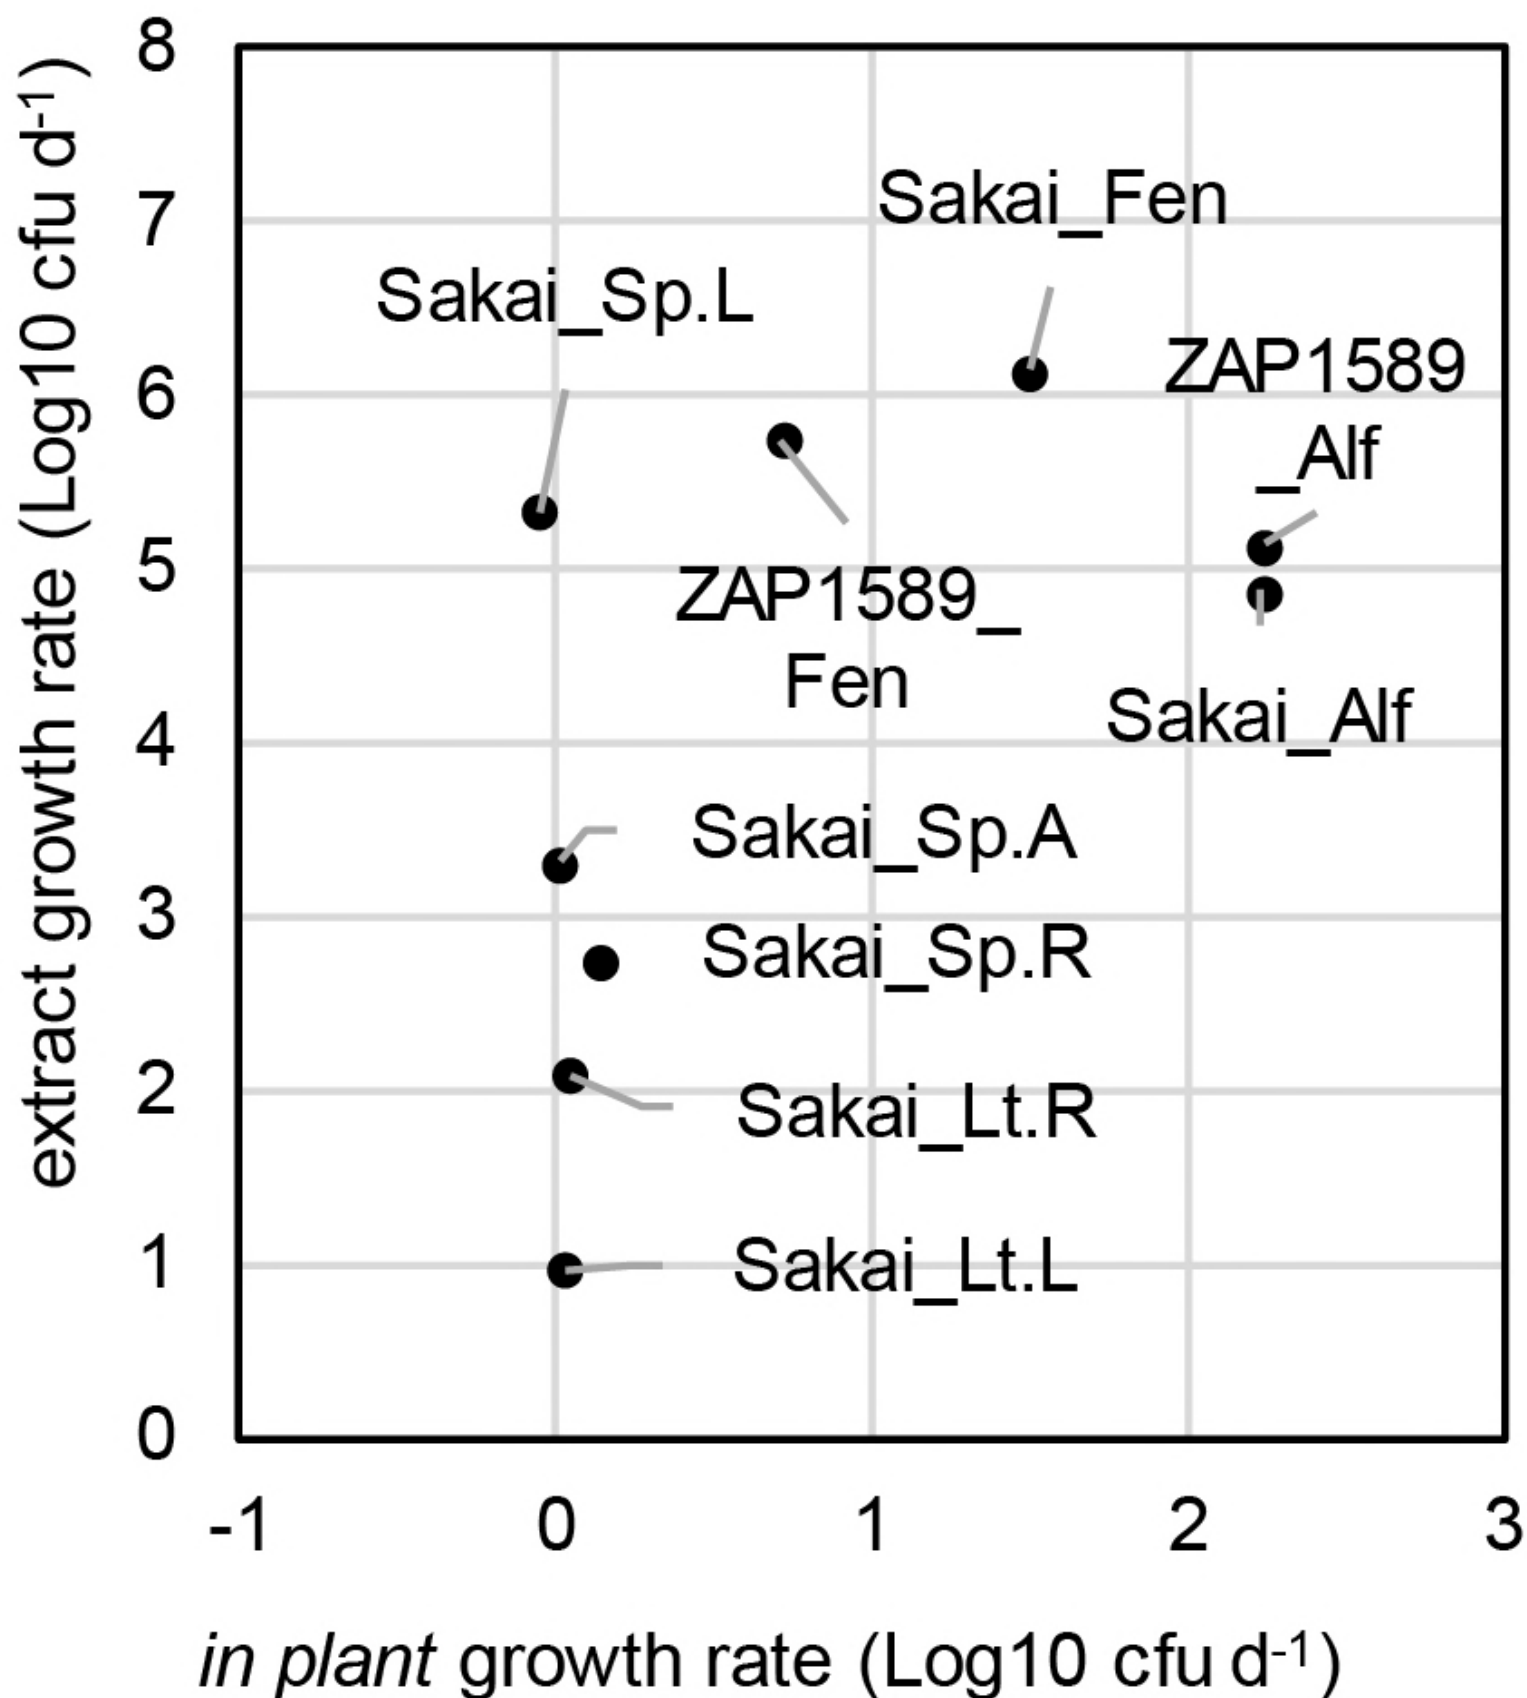

Source: http://biorxiv.org/content/10.1101/523175v1.full.pdf
